# Supplementary material
Source: PubMed Central journal article supplement (PMC4048570)
Supplement: Supp_Table1.pdf [file Supp_Table1.pdf]

Supplemental Data Table 1

| BIOCHEMICAL                               | without imputation method |                   |                   |                   | with imputation method |                     |                    |                   | outlier deleted with imputation method |                   |                   |                   |
|-------------------------------------------|---------------------------|-------------------|-------------------|-------------------|------------------------|---------------------|--------------------|-------------------|----------------------------------------|-------------------|-------------------|-------------------|
|                                           | N of pairs used           | CVw (95% CI)      | CVb (95% CI)      | ICC (95% CI)      | N of pairs used        | CVw (95% CI)        | CVb (95% CI)       | ICC (95% CI)      | N of pairs used                        | CVw (95% CI)      | CVb (95% CI)      | ICC (95% CI)      |
| 1,2-propanediol                           | 60                        | 0.36 (0.28, 0.48) | 0.16 (0.09, 0.30) | 0.17 (0.03, 0.54) | 60                     | 0.36 (0.28, 0.48)   | 0.16 (0.09, 0.30)  | 0.17 (0.03, 0.54) | 59                                     | 0.32 (0.25, 0.41) | 0.16 (0.10, 0.27) | 0.21 (0.06, 0.54) |
| 1,3,7-trimethylurate                      | 13                        | 0.40 (0.20, 0.80) | 0.57 (0.35, 0.93) | 0.67 (0.34, 0.89) | 60                     | 0.33 (0.24, 0.44)   | 0.60 (0.52, 0.71)  | 0.78 (0.66, 0.86) | 58                                     | 0.25 (0.19, 0.32) | 0.37 (0.31, 0.44) | 0.69 (0.55, 0.81) |
| 1,3-dimethylurate                         | 12                        | 0.65 (0.22, 1.88) | 0.96 (0.46, 1.97) | 0.68 (0.35, 0.90) | 60                     | 0.98 (0.49, 1.96)   | 1.49 (0.95, 2.35)  | 0.70 (0.56, 0.81) | 59                                     | 0.33 (0.25, 0.44) | 0.40 (0.31, 0.50) | 0.59 (0.42, 0.74) |
| 1,5-anhydroglucitol (1,5-AG)              | 60                        | 0.13 (0.11, 0.16) | 0.34 (0.31, 0.37) | 0.87 (0.79, 0.92) | 60                     | 0.13 (0.11, 0.16)   | 0.34 (0.31, 0.37)  | 0.87 (0.79, 0.92) | 60                                     | 0.13 (0.11, 0.16) | 0.34 (0.31, 0.37) | 0.87 (0.79, 0.92) |
| 1,6-anhydroglucose                        | 34                        | 0.87 (0.42, 1.78) | 0.58 (0.19, 1.71) | 0.31 (0.10, 0.65) | 60                     | 1.09 (0.56, 2.15)   | 0.80 (0.32, 2.01)  | 0.35 (0.17, 0.59) | 59                                     | 0.79 (0.47, 1.32) | 0.72 (0.41, 1.27) | 0.46 (0.27, 0.65) |
| 1,7-dimethylurate                         | 27                        | 0.44 (0.27, 0.71) | 0.42 (0.25, 0.69) | 0.47 (0.22, 0.74) | 60                     | 0.56 (0.37, 0.84)   | 0.71 (0.51, 0.98)  | 0.61 (0.45, 0.76) | 59                                     | 0.50 (0.34, 0.72) | 0.58 (0.42, 0.79) | 0.57 (0.40, 0.73) |
| 10-heptadecenoate (17:1n7)                | 60                        | 0.30 (0.23, 0.39) | 0.30 (0.23, 0.39) | 0.50 (0.32, 0.68) | 60                     | 0.30 (0.23, 0.39)   | 0.30 (0.23, 0.39)  | 0.50 (0.32, 0.68) | 59                                     | 0.27 (0.21, 0.35) | 0.29 (0.23, 0.37) | 0.53 (0.35, 0.70) |
| 10-nonadecenoate (19:1n9)                 | 60                        | 0.32 (0.24, 0.41) | 0.30 (0.23, 0.40) | 0.48 (0.29, 0.67) | 60                     | 0.32 (0.24, 0.41)   | 0.30 (0.23, 0.40)  | 0.48 (0.29, 0.67) | 59                                     | 0.28 (0.22, 0.37) | 0.30 (0.24, 0.39) | 0.53 (0.36, 0.71) |
| 10-undecenoate (11:1n1)                   | 60                        | 0.22 (0.17, 0.27) | 0.29 (0.24, 0.34) | 0.64 (0.48, 0.77) | 60                     | 0.22 (0.17, 0.27)   | 0.29 (0.24, 0.34)  | 0.64 (0.48, 0.77) | 60                                     | 0.22 (0.17, 0.27) | 0.29 (0.24, 0.34) | 0.64 (0.48, 0.77) |
| 12-HETE                                   | 33                        | 0.65 (0.33, 1.28) | 1.16 (0.79, 1.69) | 0.76 (0.59, 0.87) | 60                     | 0.90 (0.45, 1.81)   | 1.73 (1.21, 2.49)  | 0.79 (0.68, 0.87) | 59                                     | 0.95 (0.44, 2.06) | 2.01 (1.40, 2.90) | 0.82 (0.72, 0.89) |
| 13-HODE + 9-HODE                          | 60                        | 0.27 (0.21, 0.34) | 0.19 (0.13, 0.26) | 0.32 (0.15, 0.57) | 60                     | 0.27 (0.21, 0.34)   | 0.19 (0.13, 0.26)  | 0.32 (0.15, 0.57) | 59                                     | 0.23 (0.18, 0.29) | 0.16 (0.12, 0.23) | 0.34 (0.16, 0.59) |
| 1-arachidonoylglycerophosphocholine*      | 58                        | 0.56 (0.39, 0.82) | 0.19 (0.06, 0.57) | 0.10 (0.01, 0.65) | 60                     | 0.58 (0.40, 0.84)   | 0.21 (0.07, 0.59)  | 0.11 (0.01, 0.60) | 60                                     | 0.58 (0.40, 0.84) | 0.21 (0.07, 0.59) | 0.11 (0.01, 0.60) |
| 1-arachidonoylglycerophosphoethanolamine* | 60                        | 0.21 (0.17, 0.26) | 0.15 (0.11, 0.21) | 0.34 (0.16, 0.58) | 60                     | 0.21 (0.17, 0.26)   | 0.15 (0.11, 0.21)  | 0.34 (0.16, 0.58) | 59                                     | 0.18 (0.15, 0.22) | 0.16 (0.13, 0.21) | 0.45 (0.26, 0.65) |
| 1-arachidonoylglycerophosphoinositol*     | 60                        | 0.23 (0.19, 0.29) | 0.11 (0.07, 0.18) | 0.19 (0.05, 0.53) | 60                     | 0.23 (0.19, 0.29)   | 0.11 (0.07, 0.18)  | 0.19 (0.05, 0.53) | 60                                     | 0.23 (0.19, 0.29) | 0.11 (0.07, 0.18) | 0.19 (0.05, 0.53) |
| 1-docosaheptaenoylglycerophosphocholine*  | 60                        | 0.61 (0.41, 0.91) | 0.27 (0.11, 0.67) | 0.16 (0.03, 0.54) | 60                     | 0.61 (0.41, 0.91)   | 0.27 (0.11, 0.67)  | 0.16 (0.03, 0.54) | 59                                     | 0.55 (0.38, 0.79) | 0.21 (0.08, 0.54) | 0.13 (0.02, 0.58) |
| 1-docosapentaenoylglycerophosphocholine*  | 33                        | 0.36 (0.25, 0.52) | 0.14 (0.05, 0.37) | 0.13 (0.01, 0.74) | 60                     | 0.47 (0.34, 0.66)   | 0.38 (0.25, 0.58)  | 0.40 (0.21, 0.62) | 59                                     | 0.44 (0.32, 0.62) | 0.42 (0.30, 0.60) | 0.48 (0.29, 0.67) |
| 1-eicosadienoylglycerophosphocholine*     | 55                        | 0.41 (0.30, 0.55) | 0.08 (0.01, 0.39) | 0.03 (0.00, 0.99) | 60                     | 0.40 (0.30, 0.54)   | 0.17 (0.08, 0.34)  | 0.14 (0.02, 0.56) | 59                                     | 0.35 (0.27, 0.46) | 0.18 (0.10, 0.30) | 0.20 (0.05, 0.54) |
| 1-eicosatrienoylglycerophosphocholine*    | 60                        | 0.37 (0.28, 0.50) | 0.29 (0.20, 0.42) | 0.38 (0.19, 0.60) | 60                     | 0.37 (0.28, 0.50)   | 0.29 (0.20, 0.42)  | 0.38 (0.19, 0.60) | 58                                     | 0.32 (0.25, 0.42) | 0.23 (0.16, 0.34) | 0.35 (0.16, 0.59) |
| 1-heptadecanoylglycerophosphocholine      | 51                        | 0.48 (0.34, 0.69) | 0.18 (0.07, 0.47) | 0.12 (0.01, 0.64) | 60                     | 0.54 (0.38, 0.77)   | 0.23 (0.10, 0.54)  | 0.15 (0.03, 0.55) | 59                                     | 0.48 (0.35, 0.67) | 0.20 (0.09, 0.44) | 0.15 (0.02, 0.56) |
| 1-linoleoylglycerol (1-monolinolein)      | 20                        | 0.38 (0.25, 0.59) | (. , .)           | 0.00 (. , .)      | 60                     | 0.43 (0.32, 0.58)   | 0.24 (0.13, 0.41)  | 0.23 (0.07, 0.54) | 59                                     | 0.41 (0.30, 0.55) | 0.26 (0.17, 0.42) | 0.29 (0.12, 0.56) |
| 1-linoleoylglycerophosphocholine          | 60                        | 0.50 (0.37, 0.69) | (. , .)           | 0.00 (. , .)      | 60                     | 0.50 (0.37, 0.69)   | (. , .)            | 0.00 (. , .)      | 59                                     | 0.48 (0.35, 0.64) | (. , .)           | 0.00 (. , .)      |
| 1-linoleoylglycerophosphoethanolamine*    | 60                        | 0.27 (0.21, 0.34) | 0.25 (0.20, 0.33) | 0.47 (0.29, 0.66) | 60                     | 0.27 (0.21, 0.34)   | 0.25 (0.20, 0.33)  | 0.47 (0.29, 0.66) | 60                                     | 0.27 (0.21, 0.34) | 0.25 (0.20, 0.33) | 0.47 (0.29, 0.66) |
| 1-methylurate                             | 31                        | 0.43 (0.27, 0.70) | 0.66 (0.48, 0.91) | 0.70 (0.50, 0.85) | 60                     | 0.49 (0.33, 0.72)   | 0.86 (0.68, 1.07)  | 0.76 (0.63, 0.85) | 59                                     | 0.40 (0.29, 0.55) | 0.57 (0.46, 0.72) | 0.67 (0.52, 0.80) |
| 1-myristoylglycerophosphocholine          | 60                        | 0.50 (0.35, 0.70) | 0.27 (0.14, 0.50) | 0.22 (0.07, 0.53) | 60                     | 0.50 (0.35, 0.70)   | 0.27 (0.14, 0.50)  | 0.22 (0.07, 0.53) | 59                                     | 0.48 (0.34, 0.68) | 0.32 (0.19, 0.53) | 0.30 (0.13, 0.57) |
| 1-oleoylglycerol (1-monoollein)           | 51                        | 0.66 (0.42, 1.05) | 0.40 (0.19, 0.86) | 0.27 (0.09, 0.57) | 60                     | 0.63 (0.42, 0.95)   | 0.38 (0.19, 0.75)  | 0.27 (0.10, 0.55) | 58                                     | 0.40 (0.30, 0.55) | 0.36 (0.25, 0.51) | 0.44 (0.26, 0.65) |
| 1-oleoylglycerophosphocholine             | 60                        | 0.29 (0.23, 0.37) | 0.14 (0.09, 0.23) | 0.20 (0.05, 0.53) | 60                     | 0.29 (0.23, 0.37)   | 0.14 (0.09, 0.23)  | 0.20 (0.05, 0.53) | 60                                     | 0.29 (0.23, 0.37) | 0.14 (0.09, 0.23) | 0.20 (0.05, 0.53) |
| 1-oleoylglycerophosphoethanolamine        | 60                        | 0.32 (0.25, 0.42) | 0.32 (0.24, 0.42) | 0.49 (0.31, 0.68) | 60                     | 0.32 (0.25, 0.42)   | 0.32 (0.24, 0.42)  | 0.49 (0.31, 0.68) | 59                                     | 0.30 (0.23, 0.40) | 0.28 (0.21, 0.37) | 0.45 (0.26, 0.65) |
| 1-palmitoleoylglycerophosphocholine*      | 60                        | 0.54 (0.38, 0.77) | 0.25 (0.11, 0.54) | 0.17 (0.04, 0.54) | 60                     | 0.54 (0.38, 0.77)   | 0.25 (0.11, 0.54)  | 0.17 (0.04, 0.54) | 59                                     | 0.54 (0.38, 0.77) | 0.22 (0.09, 0.53) | 0.15 (0.02, 0.56) |
| 1-palmitoylglycerol (1-monopalmitin)      | 55                        | 0.37 (0.27, 0.50) | 0.32 (0.23, 0.45) | 0.43 (0.24, 0.65) | 60                     | 0.37 (0.28, 0.50)   | 0.32 (0.23, 0.45)  | 0.43 (0.25, 0.64) | 59                                     | 0.32 (0.25, 0.42) | 0.32 (0.24, 0.42) | 0.49 (0.31, 0.68) |
| 1-palmitoylglycerophosphocholine          | 60                        | 0.21 (0.17, 0.27) | 0.09 (0.06, 0.15) | 0.16 (0.03, 0.54) | 60                     | 0.21 (0.17, 0.27)   | 0.09 (0.06, 0.15)  | 0.16 (0.03, 0.54) | 60                                     | 0.21 (0.17, 0.27) | 0.09 (0.06, 0.15) | 0.16 (0.03, 0.54) |
| 1-palmitoylglycerophosphoethanolamine     | 60                        | 0.49 (0.35, 0.68) | 0.09 (0.02, 0.52) | 0.04 (0.00, 0.98) | 60                     | 0.49 (0.35, 0.68)   | 0.09 (0.02, 0.52)  | 0.04 (0.00, 0.98) | 60                                     | 0.49 (0.35, 0.68) | 0.09 (0.02, 0.52) | 0.04 (0.00, 0.98) |
| 1-palmitoylglycerophosphoinositol*        | 26                        | 0.27 (0.18, 0.39) | 0.25 (0.17, 0.37) | 0.47 (0.21, 0.74) | 60                     | 0.50 (0.35, 0.70)   | 0.42 (0.28, 0.63)  | 0.42 (0.23, 0.63) | 60                                     | 0.50 (0.35, 0.70) | 0.42 (0.28, 0.63) | 0.42 (0.23, 0.63) |
| 1-pentadecanoylglycerophosphocholine*     | 42                        | 0.55 (0.36, 0.84) | 0.17 (0.04, 0.69) | 0.09 (0.00, 0.81) | 60                     | 0.62 (0.42, 0.92)   | 0.16 (0.03, 0.75)  | 0.06 (0.00, 0.85) | 60                                     | 0.62 (0.42, 0.92) | 0.16 (0.03, 0.75) | 0.06 (0.00, 0.85) |
| 1-stearoylglycerol (1-monostearin)        | 31                        | 0.50 (0.31, 0.80) | 0.26 (0.10, 0.64) | 0.21 (0.03, 0.67) | 60                     | 0.86 (0.51, 1.44)   | 0.32 (0.08, 1.30)  | 0.12 (0.01, 0.59) | 58                                     | 0.62 (0.41, 0.92) | 0.32 (0.15, 0.70) | 0.21 (0.06, 0.54) |
| 1-stearoylglycerophosphocholine           | 60                        | 0.28 (0.22, 0.35) | 0.14 (0.09, 0.23) | 0.20 (0.05, 0.53) | 60                     | 0.28 (0.22, 0.35)   | 0.14 (0.09, 0.23)  | 0.20 (0.05, 0.53) | 59                                     | 0.25 (0.20, 0.32) | 0.14 (0.09, 0.21) | 0.23 (0.07, 0.54) |
| 1-stearoylglycerophosphoinositol          | 58                        | 0.55 (0.38, 0.79) | 0.11 (0.02, 0.70) | 0.04 (0.00, 0.98) | 60                     | 0.54 (0.38, 0.76)   | 0.10 (0.02, 0.64)  | 0.04 (0.00, 0.98) | 59                                     | 0.52 (0.37, 0.75) | 0.17 (0.06, 0.50) | 0.10 (0.01, 0.65) |
| 21-hydroxypregnenolone disulfate          | 37                        | 0.22 (0.14, 0.36) | 1.22 (1.12, 1.34) | 0.97 (0.94, 0.98) | 60                     | 0.23 (0.16, 0.34)   | 1.27 (1.19, 1.36)  | 0.97 (0.95, 0.98) | 59                                     | 0.18 (0.14, 0.23) | 0.51 (0.47, 0.56) | 0.89 (0.83, 0.94) |
| 2-aminobutyrate                           | 60                        | 0.18 (0.15, 0.22) | 0.21 (0.17, 0.25) | 0.57 (0.40, 0.73) | 60                     | 0.18 (0.15, 0.22)   | 0.21 (0.17, 0.25)  | 0.57 (0.40, 0.73) | 60                                     | 0.18 (0.15, 0.22) | 0.21 (0.17, 0.25) | 0.57 (0.40, 0.73) |
| 2-arachidonoylglycerophosphocholine*      | 40                        | 0.34 (0.24, 0.46) | 0.21 (0.12, 0.35) | 0.28 (0.09, 0.62) | 60                     | 0.39 (0.29, 0.52)   | 0.20 (0.12, 0.35)  | 0.21 (0.06, 0.53) | 59                                     | 0.34 (0.26, 0.45) | 0.22 (0.14, 0.34) | 0.29 (0.12, 0.56) |
| 2-arachidonoylglycerophosphoethanolamine* | 28                        | 0.25 (0.18, 0.35) | 0.09 (0.04, 0.23) | 0.13 (0.01, 0.80) | 60                     | 0.48 (0.35, 0.67)   | 0.13 (0.04, 0.43)  | 0.07 (0.00, 0.78) | 60                                     | 0.48 (0.35, 0.67) | 0.13 (0.04, 0.43) | 0.07 (0.00, 0.78) |
| 2-hydroxy-3-methylvalerate                | 16                        | 0.38 (0.22, 0.65) | 0.27 (0.13, 0.58) | 0.34 (0.07, 0.78) | 60                     | 0.42 (0.30, 0.57)   | 0.48 (0.36, 0.63)  | 0.57 (0.40, 0.73) | 59                                     | 0.32 (0.24, 0.42) | 0.40 (0.32, 0.50) | 0.61 (0.45, 0.76) |
| 2-hydroxyacetaminophen sulfate*           | 8                         | 0.41 (0.15, 1.13) | 0.90 (0.56, 1.42) | 0.83 (0.51, 0.96) | 60                     | 2.13 (0.52, 8.69)   | 2.79 (0.95, 8.16)  | 0.63 (0.47, 0.77) | 59                                     | 0.71 (0.35, 1.42) | 2.10 (1.66, 2.65) | 0.90 (0.84, 0.94) |
| 2-hydroxybutyrate (AHB)                   | 60                        | 0.25 (0.19, 0.31) | 0.27 (0.22, 0.34) | 0.56 (0.38, 0.72) | 60                     | 0.25 (0.19, 0.31)   | 0.27 (0.22, 0.34)  | 0.56 (0.38, 0.72) | 59                                     | 0.22 (0.18, 0.28) | 0.27 (0.23, 0.33) | 0.60 (0.43, 0.75) |
| 2-hydroxyglutarate                        | 45                        | 0.36 (0.26, 0.49) | 0.11 (0.04, 0.30) | 0.08 (0.00, 0.81) | 60                     | 0.42 (0.31, 0.57)   | 0.02 (0.00, 4.29)  | 0.00 (0.00, 1.00) | 60                                     | 0.42 (0.31, 0.57) | 0.02 (0.00, 4.29) | 0.00 (0.00, 1.00) |
| 2-hydroxyhippurate (salicylurate)         | 41                        | 1.26 (0.37, 4.34) | 2.81 (1.62, 4.90) | 0.83 (0.72, 0.91) | 60                     | 1.49 (0.45, 4.92)   | 3.29 (1.91, 5.65)  | 0.83 (0.74, 0.89) | 59                                     | 1.05 (0.40, 2.75) | 2.87 (2.02, 4.08) | 0.88 (0.81, 0.93) |
| 2-hydroxyisobutyrate                      | 57                        | 0.31 (0.23, 0.41) | 0.42 (0.34, 0.51) | 0.65 (0.49, 0.78) | 60                     | 0.31 (0.23, 0.40)   | 0.41 (0.34, 0.50)  | 0.64 (0.49, 0.78) | 59                                     | 0.23 (0.19, 0.29) | 0.14 (0.09, 0.20) | 0.25 (0.09, 0.54) |
| 2-hydroxyoctanoate                        | 25                        | 0.18 (0.13, 0.25) | 0.27 (0.22, 0.34) | 0.71 (0.48, 0.86) | 60                     | 0.32 (0.24, 0.42)   | 0.32 (0.25, 0.42)  | 0.50 (0.32, 0.68) | 59                                     | 0.25 (0.20, 0.32) | 0.37 (0.31, 0.44) | 0.69 (0.54, 0.80) |
| 2-hydroxypalmitate                        | 60                        | 0.15 (0.12, 0.18) | 0.14 (0.11, 0.17) | 0.47 (0.29, 0.66) | 60                     | 0.15 (0.12, 0.18)   | 0.14 (0.11, 0.17)  | 0.47 (0.29, 0.66) | 60                                     | 0.15 (0.12, 0.18) | 0.14 (0.11, 0.17) | 0.47 (0.29, 0.66) |
| 2-hydroxystearate                         | 60                        | 0.22 (0.18, 0.28) | 0.16 (0.12, 0.22) | 0.35 (0.17, 0.59) | 60                     | 0.22 (0.18, 0.28)   | 0.16 (0.12, 0.22)  | 0.35 (0.17, 0.59) | 60                                     | 0.22 (0.18, 0.28) | 0.16 (0.12, 0.22) | 0.35 (0.17, 0.59) |
| 2-linoleoylglycerophosphocholine*         | 56                        | 0.49 (0.35, 0.70) | 0.06 (0.00, 1.06) | 0.01 (0.00, 1.00) | 60                     | 0.49 (0.36, 0.67)   | (. , .)            | 0.00 (. , .)      | 60                                     | 0.49 (0.36, 0.67) | (. , .)           | 0.00 (. , .)      |
| 2-linoleoylglycerophosphoethanolamine*    | 44                        | 0.31 (0.23, 0.42) | 0.10 (0.04, 0.25) | 0.09 (0.00, 0.77) | 60                     | 0.37 (0.28, 0.49)   | 0.21 (0.13, 0.35)  | 0.25 (0.09, 0.54) | 60                                     | 0.37 (0.28, 0.49) | 0.21 (0.13, 0.35) | 0.25 (0.09, 0.54) |
| 2-methoxyacetaminophen glucuronide*       | 3                         | 2.46 (0.00, 1264) | (. , .)           | 0.00 (. , .)      | 60                     | 15.03 (0.00, 104E5) | 9.53 (0.00, 109E5) | 0.29 (0.11, 0.56) | 58                                     | 1.03 (0.45, 2.34) | 2.10 (1.40, 3.14) | 0.81 (0.70, 0.88) |

|                                                |    |                     |                    |                   |    |                      |                     |                   |    |                    |                    |                   |
|------------------------------------------------|----|---------------------|--------------------|-------------------|----|----------------------|---------------------|-------------------|----|--------------------|--------------------|-------------------|
| 2-methoxyacetaminophen sulfate*                | 6  | -5.15 (-5E3, 0.00)  | (., .)             | 0.00 (., .)       | 60 | 6.25 (0.16, 251.6)   | 4.20 (0.02, 1023)   | 0.31 (0.13, 0.57) | 58 | 0.94 (0.46, 1.93)  | 1.65 (1.10, 2.48)  | 0.75 (0.63, 0.85) |
| 2-methylbutyrylcarnitine                       | 55 | 0.17 (0.13, 0.21)   | 0.26 (0.23, 0.30)  | 0.71 (0.57, 0.82) | 60 | 0.19 (0.16, 0.24)    | 0.27 (0.23, 0.32)   | 0.66 (0.51, 0.79) | 60 | 0.19 (0.16, 0.24)  | 0.27 (0.23, 0.32)  | 0.66 (0.51, 0.79) |
| 2-oleoylglycerophosphocholine*                 | 60 | 0.32 (0.24, 0.41)   | 0.18 (0.12, 0.28)  | 0.25 (0.09, 0.54) | 60 | 0.32 (0.24, 0.41)    | 0.18 (0.12, 0.28)   | 0.25 (0.09, 0.54) | 60 | 0.32 (0.24, 0.41)  | 0.18 (0.12, 0.28)  | 0.25 (0.09, 0.54) |
| 2-oleoylglycerophosphoethanolamine*            | 39 | 0.32 (0.23, 0.44)   | 0.03 (0.00, 1.35)  | 0.01 (0.00, 1.00) | 60 | 0.45 (0.34, 0.60)    | (., .)              | 0.00 (., .)       | 60 | 0.45 (0.34, 0.60)  | (., .)             | 0.00 (., .)       |
| 2-palmitoylglycerophosphocholine*              | 60 | 0.45 (0.33, 0.61)   | 0.10 (0.02, 0.41)  | 0.04 (0.00, 0.95) | 60 | 0.45 (0.33, 0.61)    | 0.10 (0.02, 0.41)   | 0.04 (0.00, 0.95) | 60 | 0.45 (0.33, 0.61)  | 0.10 (0.02, 0.41)  | 0.04 (0.00, 0.95) |
| 2-palmitoylglycerophosphoethanolamine*         | 51 | 0.36 (0.27, 0.48)   | 0.05 (0.01, 0.43)  | 0.02 (0.00, 1.00) | 60 | 0.39 (0.29, 0.53)    | 0.18 (0.10, 0.34)   | 0.17 (0.04, 0.54) | 60 | 0.39 (0.29, 0.53)  | 0.18 (0.10, 0.34)  | 0.17 (0.04, 0.54) |
| 2-stearoylglycerophosphocholine*               | 58 | 0.32 (0.25, 0.42)   | 0.22 (0.15, 0.33)  | 0.33 (0.15, 0.58) | 60 | 0.33 (0.25, 0.42)    | 0.22 (0.15, 0.32)   | 0.31 (0.13, 0.56) | 59 | 0.25 (0.20, 0.32)  | 0.21 (0.16, 0.28)  | 0.40 (0.22, 0.62) |
| 3-(4-hydroxyphenyl)lactate                     | 60 | 0.14 (0.11, 0.17)   | 0.24 (0.21, 0.27)  | 0.75 (0.62, 0.84) | 60 | 0.14 (0.11, 0.17)    | 0.24 (0.21, 0.27)   | 0.75 (0.62, 0.84) | 60 | 0.14 (0.11, 0.17)  | 0.24 (0.21, 0.27)  | 0.75 (0.62, 0.84) |
| 3-(cystein-S-yl)acetaminophen*                 | 7  | -2.71 (-244, -0.03) | (., .)             | 0.00 (., .)       | 60 | -13.2 (-25E3, -0.01) | -4.51 (-18E9, 0.00) | 0.10 (0.01, 0.63) | 58 | 1.26 (0.51, 3.11)  | 1.94 (1.08, 3.49)  | 0.70 (0.56, 0.81) |
| 3-carboxy-4-methyl-5-propyl-2-furanpropanoate  | 60 | 0.47 (0.32, 0.69)   | 0.80 (0.64, 1.00)  | 0.74 (0.62, 0.84) | 60 | 0.47 (0.32, 0.69)    | 0.80 (0.64, 1.00)   | 0.74 (0.62, 0.84) | 59 | 0.39 (0.27, 0.54)  | 0.76 (0.63, 0.90)  | 0.79 (0.68, 0.87) |
| 3-dehydrocarnitine*                            | 60 | 0.12 (0.09, 0.15)   | 0.45 (0.43, 0.48)  | 0.94 (0.90, 0.96) | 60 | 0.12 (0.09, 0.15)    | 0.45 (0.43, 0.48)   | 0.94 (0.90, 0.96) | 60 | 0.12 (0.09, 0.15)  | 0.45 (0.43, 0.48)  | 0.94 (0.90, 0.96) |
| 3-hydroxy-2-ethylpropionate                    | 53 | 0.23 (0.18, 0.29)   | 0.30 (0.25, 0.36)  | 0.63 (0.46, 0.78) | 60 | 0.30 (0.23, 0.39)    | 0.29 (0.22, 0.38)   | 0.48 (0.30, 0.67) | 59 | 0.27 (0.21, 0.35)  | 0.29 (0.23, 0.37)  | 0.55 (0.37, 0.71) |
| 3-hydroxybutyrate (BHBA)                       | 60 | 0.70 (0.44, 1.09)   | 0.50 (0.27, 0.94)  | 0.34 (0.16, 0.58) | 60 | 0.70 (0.44, 1.09)    | 0.50 (0.27, 0.94)   | 0.34 (0.16, 0.58) | 59 | 0.60 (0.40, 0.91)  | 0.50 (0.30, 0.82)  | 0.41 (0.22, 0.62) |
| 3-hydroxydecanoate                             | 60 | 0.34 (0.26, 0.44)   | 0.35 (0.27, 0.46)  | 0.53 (0.35, 0.70) | 60 | 0.34 (0.26, 0.44)    | 0.35 (0.27, 0.46)   | 0.53 (0.35, 0.70) | 59 | 0.26 (0.21, 0.34)  | 0.24 (0.18, 0.31)  | 0.45 (0.27, 0.65) |
| 3-hydroxyisobutyrate                           | 59 | 0.23 (0.18, 0.29)   | 0.26 (0.21, 0.32)  | 0.56 (0.39, 0.72) | 60 | 0.23 (0.19, 0.29)    | 0.27 (0.22, 0.33)   | 0.57 (0.40, 0.73) | 60 | 0.23 (0.19, 0.29)  | 0.27 (0.22, 0.33)  | 0.57 (0.40, 0.73) |
| 3-indoxyl sulfate                              | 60 | 0.28 (0.22, 0.36)   | 0.36 (0.30, 0.44)  | 0.63 (0.47, 0.76) | 60 | 0.28 (0.22, 0.36)    | 0.36 (0.30, 0.44)   | 0.63 (0.47, 0.76) | 59 | 0.23 (0.18, 0.30)  | 0.36 (0.31, 0.42)  | 0.71 (0.57, 0.82) |
| 3-methoxytyrosine                              | 57 | 0.30 (0.07, 1.34)   | 5.61 (5.17, 6.07)  | 1.00 (1.00, 1.00) | 60 | 0.31 (0.07, 1.36)    | 5.73 (5.29, 6.21)   | 1.00 (1.00, 1.00) | 59 | 0.27 (0.21, 0.35)  | 0.27 (0.21, 0.35)  | 0.49 (0.30, 0.67) |
| 3-methyl-2-oxobutyrate                         | 60 | 0.13 (0.11, 0.16)   | 0.15 (0.12, 0.17)  | 0.56 (0.39, 0.72) | 60 | 0.13 (0.11, 0.16)    | 0.15 (0.12, 0.17)   | 0.56 (0.39, 0.72) | 60 | 0.13 (0.11, 0.16)  | 0.15 (0.12, 0.17)  | 0.56 (0.39, 0.72) |
| 3-methyl-2-oxovalerate                         | 60 | 0.13 (0.11, 0.16)   | 0.18 (0.16, 0.21)  | 0.64 (0.49, 0.78) | 60 | 0.13 (0.11, 0.16)    | 0.18 (0.16, 0.21)   | 0.64 (0.49, 0.78) | 59 | 0.12 (0.10, 0.14)  | 0.18 (0.16, 0.21)  | 0.70 (0.56, 0.82) |
| 3-methylhistidine                              | 50 | 0.53 (0.36, 0.77)   | 0.14 (0.04, 0.58)  | 0.07 (0.00, 0.84) | 60 | 0.60 (0.41, 0.88)    | 0.25 (0.10, 0.63)   | 0.15 (0.02, 0.55) | 60 | 0.60 (0.41, 0.88)  | 0.25 (0.10, 0.63)  | 0.15 (0.02, 0.55) |
| 3-methylxanthine                               | 27 | 0.38 (0.25, 0.60)   | 0.42 (0.28, 0.64)  | 0.55 (0.29, 0.78) | 60 | 0.47 (0.33, 0.67)    | 0.60 (0.46, 0.79)   | 0.63 (0.46, 0.76) | 60 | 0.47 (0.33, 0.67)  | 0.60 (0.46, 0.79)  | 0.63 (0.46, 0.76) |
| 3-phenylpropionate (hydrocinnamate)            | 42 | 0.54 (0.34, 0.85)   | 0.54 (0.34, 0.85)  | 0.50 (0.29, 0.71) | 60 | 0.58 (0.38, 0.88)    | 0.71 (0.51, 1.00)   | 0.60 (0.44, 0.75) | 59 | 0.51 (0.35, 0.76)  | 0.69 (0.52, 0.92)  | 0.64 (0.49, 0.78) |
| 4-acetamidobutanoate                           | 51 | 0.24 (0.19, 0.31)   | 0.27 (0.22, 0.34)  | 0.57 (0.38, 0.74) | 60 | 0.28 (0.22, 0.36)    | 0.30 (0.24, 0.38)   | 0.53 (0.36, 0.70) | 60 | 0.28 (0.22, 0.36)  | 0.30 (0.24, 0.38)  | 0.53 (0.36, 0.70) |
| 4-acetamidophenol                              | 7  | 4.04 (0.00, 3272)   | (., .)             | 0.00 (., .)       | 60 | 81.00 (0.00, 11E21)  | 27.38 (0.00, 97E5)  | 0.10 (0.01, 0.63) | 59 | 2.39 (0.55, 10.39) | 2.03 (0.36, 11.47) | 0.42 (0.23, 0.63) |
| 4-acetaminophen sulfate                        | 8  | 4.98 (0.00, 16809)  | 3.62 (0.00, 256E3) | 0.35 (0.03, 0.89) | 60 | -14.6 (-98E3, 0.00)  | -11.9 (-61E4, 0.00) | 0.40 (0.21, 0.62) | 58 | 1.46 (0.35, 6.11)  | 4.43 (2.76, 7.10)  | 0.90 (0.84, 0.94) |
| 4-androsten-3beta,17beta-diol disulfate 1*     | 58 | 0.28 (0.18, 0.43)   | 1.37 (1.26, 1.49)  | 0.96 (0.94, 0.98) | 60 | 0.28 (0.18, 0.43)    | 1.41 (1.29, 1.53)   | 0.96 (0.94, 0.98) | 59 | 0.27 (0.17, 0.41)  | 1.39 (1.28, 1.51)  | 0.96 (0.94, 0.98) |
| 4-androsten-3beta,17beta-diol disulfate 2*     | 58 | 0.17 (0.13, 0.23)   | 0.69 (0.64, 0.73)  | 0.94 (0.90, 0.96) | 60 | 0.17 (0.13, 0.23)    | 0.71 (0.67, 0.76)   | 0.94 (0.91, 0.97) | 59 | 0.16 (0.12, 0.20)  | 0.55 (0.51, 0.59)  | 0.92 (0.88, 0.95) |
| 4-ethylphenylsulfate                           | 11 | 0.48 (0.16, 1.42)   | 1.29 (0.86, 1.93)  | 0.88 (0.67, 0.96) | 60 | 1.27 (0.57, 2.83)    | 1.20 (0.52, 2.81)   | 0.47 (0.29, 0.66) | 59 | 0.86 (0.40, 1.84)  | 2.17 (1.61, 2.94)  | 0.86 (0.79, 0.92) |
| 4-guanidinobutanoate                           | 21 | 0.30 (0.20, 0.47)   | 0.29 (0.18, 0.46)  | 0.48 (0.20, 0.78) | 60 | 0.33 (0.25, 0.43)    | 0.28 (0.20, 0.38)   | 0.42 (0.23, 0.63) | 59 | 0.32 (0.25, 0.42)  | 0.25 (0.18, 0.35)  | 0.39 (0.20, 0.61) |
| 4-hydroxyhippurate                             | 43 | 0.34 (0.24, 0.47)   | 0.43 (0.33, 0.56)  | 0.62 (0.43, 0.78) | 60 | 0.38 (0.28, 0.52)    | 0.53 (0.43, 0.67)   | 0.66 (0.51, 0.79) | 59 | 0.33 (0.25, 0.44)  | 0.52 (0.44, 0.63)  | 0.72 (0.58, 0.82) |
| 4-hydroxyphenylacetate                         | 6  | 0.25 (0.11, 0.57)   | 0.49 (0.32, 0.75)  | 0.79 (0.38, 0.96) | 60 | 0.80 (0.46, 1.39)    | 1.00 (0.64, 1.56)   | 0.61 (0.44, 0.75) | 58 | 0.42 (0.29, 0.62)  | 0.89 (0.74, 1.07)  | 0.82 (0.71, 0.89) |
| 4-methyl-2-oxopentanoate                       | 60 | 0.13 (0.10, 0.15)   | 0.21 (0.19, 0.24)  | 0.74 (0.61, 0.84) | 60 | 0.13 (0.10, 0.15)    | 0.21 (0.19, 0.24)   | 0.74 (0.61, 0.84) | 60 | 0.13 (0.10, 0.15)  | 0.21 (0.19, 0.24)  | 0.74 (0.61, 0.84) |
| 4-vinylphenol sulfate                          | 55 | 1.56 (0.60, 4.05)   | 0.57 (0.04, 7.75)  | 0.12 (0.01, 0.62) | 60 | 1.63 (0.63, 4.24)    | 0.70 (0.07, 6.52)   | 0.15 (0.03, 0.55) | 59 | 0.84 (0.49, 1.45)  | 0.64 (0.31, 1.30)  | 0.36 (0.18, 0.60) |
| 5-acetylamino-6-amino-3-methyluracil           | 10 | 0.88 (0.13, 5.99)   | 2.26 (1.07, 4.78)  | 0.87 (0.63, 0.96) | 60 | 1.19 (0.41, 3.44)    | 3.17 (2.13, 4.72)   | 0.88 (0.81, 0.92) | 59 | 0.61 (0.40, 0.91)  | 0.43 (0.24, 0.76)  | 0.33 (0.15, 0.58) |
| 5alpha-androstan-3alpha,17beta-diol disulfate  | 5  | 0.38 (0.14, 1.04)   | 0.31 (0.09, 1.07)  | 0.40 (0.03, 0.94) | 60 | 0.38 (0.27, 0.54)    | 0.78 (0.66, 0.93)   | 0.81 (0.70, 0.88) | 57 | 0.14 (0.11, 0.18)  | 0.48 (0.45, 0.52)  | 0.92 (0.87, 0.95) |
| 5alpha-androstan-3beta,17beta-diol disulfate   | 49 | 0.23 (0.17, 0.31)   | 0.63 (0.56, 0.70)  | 0.88 (0.81, 0.93) | 60 | 0.24 (0.18, 0.33)    | 0.77 (0.70, 0.85)   | 0.91 (0.85, 0.94) | 59 | 0.24 (0.18, 0.32)  | 0.80 (0.73, 0.87)  | 0.92 (0.87, 0.95) |
| 5alpha-pregnan-3beta,20alpha-diol disulfate    | 33 | 0.44 (0.28, 0.70)   | 0.61 (0.43, 0.85)  | 0.65 (0.44, 0.82) | 60 | 0.46 (0.32, 0.67)    | 0.76 (0.60, 0.95)   | 0.73 (0.60, 0.83) | 58 | 0.29 (0.22, 0.40)  | 0.70 (0.61, 0.79)  | 0.85 (0.76, 0.91) |
| 5-dodecenoate (12:1n7)                         | 58 | 0.25 (0.20, 0.32)   | 0.25 (0.19, 0.31)  | 0.48 (0.30, 0.67) | 60 | 0.25 (0.20, 0.32)    | 0.25 (0.20, 0.32)   | 0.50 (0.32, 0.68) | 59 | 0.21 (0.17, 0.27)  | 0.25 (0.21, 0.31)  | 0.59 (0.42, 0.74) |
| 5-methyluridine (ribothymidine)                | 22 | 0.14 (0.10, 0.19)   | 0.13 (0.09, 0.19)  | 0.49 (0.21, 0.77) | 60 | 0.14 (0.11, 0.17)    | 0.12 (0.10, 0.15)   | 0.43 (0.24, 0.63) | 60 | 0.14 (0.11, 0.17)  | 0.12 (0.10, 0.15)  | 0.43 (0.24, 0.63) |
| 5-oxoproline                                   | 60 | 0.10 (0.08, 0.12)   | 0.17 (0.15, 0.19)  | 0.74 (0.60, 0.83) | 60 | 0.10 (0.08, 0.12)    | 0.17 (0.15, 0.19)   | 0.74 (0.60, 0.83) | 59 | 0.09 (0.07, 0.10)  | 0.16 (0.14, 0.18)  | 0.77 (0.65, 0.86) |
| 7-alpha-hydroxy-3-oxo-4-cholestenoate (7-Hoca) | 60 | 0.22 (0.18, 0.28)   | 0.16 (0.12, 0.22)  | 0.35 (0.17, 0.59) | 60 | 0.22 (0.18, 0.28)    | 0.16 (0.12, 0.22)   | 0.35 (0.17, 0.59) | 59 | 0.18 (0.15, 0.23)  | 0.17 (0.13, 0.21)  | 0.45 (0.27, 0.65) |
| 7-methylguanidine                              | 57 | 0.36 (0.27, 0.47)   | 0.10 (0.04, 0.27)  | 0.08 (0.00, 0.76) | 60 | 0.36 (0.27, 0.47)    | 0.18 (0.10, 0.31)   | 0.20 (0.05, 0.53) | 59 | 0.29 (0.23, 0.37)  | 0.20 (0.14, 0.29)  | 0.32 (0.14, 0.58) |
| 7-methylxanthine                               | 31 | 0.44 (0.30, 0.64)   | (., .)             | 0.00 (., .)       | 60 | 0.50 (0.36, 0.69)    | 0.16 (0.06, 0.45)   | 0.10 (0.01, 0.65) | 59 | 0.44 (0.32, 0.60)  | 0.17 (0.07, 0.38)  | 0.13 (0.02, 0.58) |
| acetylcarnitine                                | 60 | 0.19 (0.15, 0.23)   | 0.19 (0.15, 0.23)  | 0.51 (0.33, 0.69) | 60 | 0.19 (0.15, 0.23)    | 0.19 (0.15, 0.23)   | 0.51 (0.33, 0.69) | 60 | 0.19 (0.15, 0.23)  | 0.19 (0.15, 0.23)  | 0.51 (0.33, 0.69) |
| acetylphosphate                                | 60 | 0.15 (0.12, 0.18)   | 0.11 (0.09, 0.15)  | 0.36 (0.18, 0.60) | 60 | 0.15 (0.12, 0.18)    | 0.11 (0.09, 0.15)   | 0.36 (0.18, 0.60) | 60 | 0.15 (0.12, 0.18)  | 0.11 (0.09, 0.15)  | 0.36 (0.18, 0.60) |
| adenosine                                      | 21 | 0.73 (0.33, 1.59)   | 0.49 (0.15, 1.57)  | 0.31 (0.07, 0.73) | 60 | 1.01 (0.54, 1.89)    | 0.78 (0.35, 1.76)   | 0.38 (0.19, 0.60) | 58 | 0.90 (0.50, 1.60)  | 0.76 (0.38, 1.51)  | 0.42 (0.23, 0.63) |
| ADpSGEGDFXAEggGVr*                             | 60 | 0.20 (0.16, 0.25)   | 0.32 (0.28, 0.37)  | 0.72 (0.59, 0.83) | 60 | 0.20 (0.16, 0.25)    | 0.32 (0.28, 0.37)   | 0.72 (0.59, 0.83) | 59 | 0.19 (0.15, 0.23)  | 0.33 (0.29, 0.37)  | 0.76 (0.63, 0.85) |
| adrenate (22:4n6)                              | 60 | 0.21 (0.17, 0.26)   | 0.18 (0.14, 0.23)  | 0.43 (0.24, 0.63) | 60 | 0.21 (0.17, 0.26)    | 0.18 (0.14, 0.23)   | 0.43 (0.24, 0.63) | 60 | 0.21 (0.17, 0.26)  | 0.18 (0.14, 0.23)  | 0.43 (0.24, 0.63) |
| ADSGEGDFXAEggGVr*                              | 60 | 0.32 (0.24, 0.43)   | 0.58 (0.49, 0.68)  | 0.76 (0.64, 0.85) | 60 | 0.32 (0.24, 0.43)    | 0.58 (0.49, 0.68)   | 0.76 (0.64, 0.85) | 59 | 0.28 (0.21, 0.37)  | 0.48 (0.41, 0.56)  | 0.74 (0.62, 0.84) |
| alanine                                        | 60 | 0.17 (0.14, 0.21)   | 0.19 (0.15, 0.23)  | 0.54 (0.36, 0.70) | 60 | 0.17 (0.14, 0.21)    | 0.19 (0.15, 0.23)   | 0.54 (0.36, 0.70) | 60 | 0.17 (0.14, 0.21)  | 0.19 (0.15, 0.23)  | 0.54 (0.36, 0.70) |
| alanylleucine                                  | 27 | 0.32 (0.22, 0.47)   | 0.19 (0.10, 0.36)  | 0.25 (0.05, 0.69) | 60 | 0.50 (0.36, 0.71)    | 0.31 (0.17, 0.54)   | 0.27 (0.10, 0.55) | 60 | 0.50 (0.36, 0.71)  | 0.31 (0.17, 0.54)  | 0.27 (0.10, 0.55) |
| allantoin                                      | 20 | 0.46 (0.26, 0.79)   | 0.25 (0.09, 0.69)  | 0.22 (0.03, 0.76) | 60 | 0.70 (0.45, 1.08)    | 0.24 (0.07, 0.86)   | 0.11 (0.01, 0.63) | 59 | 0.71 (0.45, 1.11)  | 0.33 (0.13, 0.87)  | 0.18 (0.04, 0.54) |
| alpha-hydroxyisocaproate                       | 33 | 0.35 (0.24, 0.50)   | 0.09 (0.02, 0.36)  | 0.07 (0.00, 0.94) | 60 | 0.36 (0.27, 0.48)    | 0.19 (0.11, 0.32)   | 0.22 (0.06, 0.53) | 59 | 0.32 (0.25, 0.42)  | 0.19 (0.13, 0.30)  | 0.27 (0.10, 0.55) |
| alpha-hydroxyisovalerate                       | 60 | 0.21 (0.17, 0.27)   | 0.44 (0.40, 0.50)  | 0.81 (0.71, 0.89) | 60 | 0.21 (0.17, 0.27)    | 0.44 (0.40, 0.50)   | 0.81 (0.71, 0.89) | 59 | 0.15 (0.12, 0.19)  | 0.41 (0.38, 0.45)  | 0.88 (0.81, 0.93) |
| alpha-tocopherol                               | 60 | 0.29 (0.22, 0.38)   | 0.39 (0.32, 0.47)  | 0.64 (0.48, 0.77) | 60 | 0.29 (0.22, 0.38)    | 0.39 (0.32, 0.47)   | 0.64 (0.48, 0.77) | 59 | 0.20 (0.16, 0.25)  | 0.34 (0.30, 0.39)  | 0.75 (0.62, 0.84) |
| andro steroid monosulfate 2*                   | 50 | 0.82 (0.44, 1.53)   | 1.14 (0.72, 1.79)  | 0.66 (0.49, 0.80) | 60 | 0.85 (0.46, 1.55)    | 1.27 (0.85, 1.90)   | 0.69 (0.55, 0.81) | 59 | 0.37 (0.25, 0.53)  | 0.98 (0.86, 1.13)  | 0.88 (0.81, 0.93) |

|                                         |    |                    |                    |                   |    |                    |                    |                   |    |                   |                   |                   |
|-----------------------------------------|----|--------------------|--------------------|-------------------|----|--------------------|--------------------|-------------------|----|-------------------|-------------------|-------------------|
| androsterone sulfate                    | 58 | 0.28 (0.22, 0.37)  | 0.44 (0.37, 0.52)  | 0.70 (0.56, 0.82) | 60 | 0.29 (0.22, 0.38)  | 0.47 (0.40, 0.55)  | 0.72 (0.59, 0.83) | 58 | 0.24 (0.19, 0.32) | 0.51 (0.45, 0.57) | 0.81 (0.71, 0.88) |
| arabinose                               | 47 | 0.23 (0.18, 0.29)  | 0.25 (0.19, 0.31)  | 0.54 (0.34, 0.73) | 60 | 0.28 (0.22, 0.37)  | 0.31 (0.25, 0.39)  | 0.54 (0.37, 0.71) | 60 | 0.28 (0.22, 0.37) | 0.31 (0.25, 0.39) | 0.54 (0.37, 0.71) |
| arabonate                               | 49 | 0.30 (0.22, 0.39)  | 0.28 (0.21, 0.38)  | 0.47 (0.27, 0.68) | 60 | 0.35 (0.26, 0.47)  | 0.35 (0.26, 0.46)  | 0.50 (0.32, 0.68) | 60 | 0.35 (0.26, 0.47) | 0.35 (0.26, 0.46) | 0.50 (0.32, 0.68) |
| arachidonate (20:4n6)                   | 60 | 0.14 (0.12, 0.17)  | 0.17 (0.15, 0.21)  | 0.60 (0.43, 0.75) | 60 | 0.14 (0.12, 0.17)  | 0.17 (0.15, 0.21)  | 0.60 (0.43, 0.75) | 59 | 0.13 (0.10, 0.16) | 0.18 (0.15, 0.20) | 0.65 (0.50, 0.78) |
| arginine                                | 60 | 0.25 (0.20, 0.32)  | 0.12 (0.08, 0.20)  | 0.19 (0.05, 0.53) | 60 | 0.25 (0.20, 0.32)  | 0.12 (0.08, 0.20)  | 0.19 (0.05, 0.53) | 59 | 0.24 (0.19, 0.30) | 0.15 (0.10, 0.22) | 0.29 (0.11, 0.56) |
| asparagine                              | 60 | 0.22 (0.18, 0.28)  | 0.14 (0.10, 0.20)  | 0.28 (0.11, 0.55) | 60 | 0.22 (0.18, 0.28)  | 0.14 (0.10, 0.20)  | 0.28 (0.11, 0.55) | 60 | 0.22 (0.18, 0.28) | 0.14 (0.10, 0.20) | 0.28 (0.11, 0.55) |
| aspartate                               | 5  | 0.10 (0.06, 0.16)  | .(,..)             | 0.00 (,..)        | 60 | 0.33 (0.27, 0.42)  | .(,..)             | 0.00 (,..)        | 59 | 0.20 (0.17, 0.24) | .(,..)            | 0.00 (,..)        |
| aspartylphenylalanine                   | 52 | 0.55 (0.37, 0.82)  | 0.38 (0.22, 0.68)  | 0.33 (0.14, 0.59) | 60 | 0.56 (0.38, 0.82)  | 0.45 (0.28, 0.72)  | 0.39 (0.21, 0.61) | 58 | 0.39 (0.29, 0.53) | 0.42 (0.32, 0.56) | 0.54 (0.36, 0.71) |
| azelate (nonanedioate)                  | 60 | 0.69 (0.45, 1.06)  | 0.12 (0.01, 1.44)  | 0.03 (0.00, 1.00) | 60 | 0.69 (0.45, 1.06)  | 0.12 (0.01, 1.44)  | 0.03 (0.00, 1.00) | 59 | 0.23 (0.18, 0.29) | 0.20 (0.16, 0.26) | 0.44 (0.25, 0.64) |
| benzoate                                | 60 | 0.17 (0.14, 0.21)  | 0.14 (0.11, 0.18)  | 0.42 (0.24, 0.63) | 60 | 0.17 (0.14, 0.21)  | 0.14 (0.11, 0.18)  | 0.42 (0.24, 0.63) | 59 | 0.15 (0.12, 0.19) | 0.15 (0.12, 0.18) | 0.49 (0.31, 0.68) |
| beta-hydroxyisovalerate                 | 60 | 0.22 (0.18, 0.28)  | 0.26 (0.22, 0.32)  | 0.58 (0.41, 0.73) | 60 | 0.22 (0.18, 0.28)  | 0.26 (0.22, 0.32)  | 0.58 (0.41, 0.73) | 60 | 0.22 (0.18, 0.28) | 0.26 (0.22, 0.32) | 0.58 (0.41, 0.73) |
| betaine                                 | 60 | 0.14 (0.12, 0.18)  | 0.19 (0.17, 0.22)  | 0.64 (0.49, 0.78) | 60 | 0.14 (0.12, 0.18)  | 0.19 (0.17, 0.22)  | 0.64 (0.49, 0.78) | 60 | 0.14 (0.12, 0.18) | 0.19 (0.17, 0.22) | 0.64 (0.49, 0.78) |
| bilirubin (E,E)*                        | 60 | 0.28 (0.22, 0.36)  | 0.24 (0.18, 0.32)  | 0.42 (0.23, 0.63) | 60 | 0.28 (0.22, 0.36)  | 0.24 (0.18, 0.32)  | 0.42 (0.23, 0.63) | 59 | 0.25 (0.20, 0.32) | 0.23 (0.18, 0.30) | 0.45 (0.26, 0.65) |
| bilirubin (E,Z or Z,E)*                 | 42 | 0.44 (0.30, 0.64)  | 0.32 (0.19, 0.54)  | 0.35 (0.14, 0.63) | 60 | 0.59 (0.40, 0.88)  | 0.44 (0.26, 0.75)  | 0.35 (0.17, 0.59) | 60 | 0.59 (0.40, 0.88) | 0.44 (0.26, 0.75) | 0.35 (0.17, 0.59) |
| bilirubin (Z,Z)                         | 58 | 0.31 (0.24, 0.40)  | 0.29 (0.22, 0.38)  | 0.47 (0.29, 0.67) | 60 | 0.31 (0.24, 0.41)  | 0.29 (0.22, 0.38)  | 0.46 (0.28, 0.66) | 59 | 0.21 (0.17, 0.27) | 0.30 (0.26, 0.36) | 0.67 (0.52, 0.79) |
| biliverdin                              | 52 | 0.47 (0.33, 0.66)  | 0.34 (0.21, 0.55)  | 0.35 (0.16, 0.60) | 60 | 0.51 (0.36, 0.72)  | 0.38 (0.24, 0.61)  | 0.36 (0.18, 0.59) | 59 | 0.44 (0.32, 0.61) | 0.37 (0.26, 0.55) | 0.42 (0.23, 0.63) |
| bradykinin, des-arg(9)                  | 44 | 0.92 (0.47, 1.81)  | 0.65 (0.25, 1.69)  | 0.33 (0.13, 0.62) | 60 | 0.98 (0.52, 1.82)  | 0.89 (0.45, 1.76)  | 0.45 (0.27, 0.65) | 58 | 0.78 (0.45, 1.34) | 0.98 (0.64, 1.51) | 0.61 (0.45, 0.76) |
| butyrylcarnitine                        | 60 | 0.18 (0.14, 0.23)  | 0.39 (0.35, 0.43)  | 0.83 (0.73, 0.89) | 60 | 0.18 (0.14, 0.23)  | 0.39 (0.35, 0.43)  | 0.83 (0.73, 0.89) | 59 | 0.17 (0.14, 0.22) | 0.38 (0.34, 0.42) | 0.83 (0.74, 0.90) |
| caffeine                                | 49 | 0.67 (0.40, 1.12)  | 0.74 (0.46, 1.18)  | 0.55 (0.35, 0.73) | 60 | 0.76 (0.45, 1.28)  | 0.94 (0.62, 1.43)  | 0.61 (0.44, 0.75) | 59 | 0.66 (0.41, 1.06) | 0.86 (0.60, 1.23) | 0.63 (0.47, 0.77) |
| caprate (10:0)                          | 59 | 0.20 (0.16, 0.25)  | 0.18 (0.14, 0.23)  | 0.45 (0.27, 0.65) | 60 | 0.20 (0.16, 0.25)  | 0.19 (0.15, 0.24)  | 0.46 (0.28, 0.66) | 60 | 0.20 (0.16, 0.25) | 0.19 (0.15, 0.24) | 0.46 (0.28, 0.66) |
| caproate (6:0)                          | 60 | 0.18 (0.14, 0.22)  | 0.14 (0.11, 0.18)  | 0.39 (0.21, 0.61) | 60 | 0.18 (0.14, 0.22)  | 0.14 (0.11, 0.18)  | 0.39 (0.21, 0.61) | 60 | 0.18 (0.14, 0.22) | 0.14 (0.11, 0.18) | 0.39 (0.21, 0.61) |
| caprylate (8:0)                         | 60 | 0.19 (0.16, 0.24)  | 0.17 (0.14, 0.22)  | 0.44 (0.26, 0.64) | 60 | 0.19 (0.16, 0.24)  | 0.17 (0.14, 0.22)  | 0.44 (0.26, 0.64) | 60 | 0.19 (0.16, 0.24) | 0.17 (0.14, 0.22) | 0.44 (0.26, 0.64) |
| carnitine                               | 60 | 0.08 (0.07, 0.10)  | 0.17 (0.16, 0.19)  | 0.82 (0.72, 0.89) | 60 | 0.08 (0.07, 0.10)  | 0.17 (0.16, 0.19)  | 0.82 (0.72, 0.89) | 60 | 0.08 (0.07, 0.10) | 0.17 (0.16, 0.19) | 0.82 (0.72, 0.89) |
| catechol sulfate                        | 60 | 0.38 (0.28, 0.51)  | 0.44 (0.34, 0.57)  | 0.57 (0.40, 0.73) | 60 | 0.38 (0.28, 0.51)  | 0.44 (0.34, 0.57)  | 0.57 (0.40, 0.73) | 59 | 0.30 (0.23, 0.39) | 0.43 (0.35, 0.52) | 0.67 (0.52, 0.79) |
| C-glycosyltryptophan*                   | 60 | 0.09 (0.07, 0.11)  | 0.21 (0.19, 0.23)  | 0.85 (0.77, 0.91) | 60 | 0.09 (0.07, 0.11)  | 0.21 (0.19, 0.23)  | 0.85 (0.77, 0.91) | 60 | 0.09 (0.07, 0.11) | 0.21 (0.19, 0.23) | 0.85 (0.77, 0.91) |
| chiro-inositol                          | 14 | 1.59 (0.21, 12.12) | 1.41 (0.14, 13.85) | 0.44 (0.13, 0.81) | 60 | 1.66 (0.60, 4.57)  | 1.33 (0.37, 4.71)  | 0.39 (0.21, 0.61) | 58 | 1.36 (0.56, 3.34) | 1.53 (0.69, 3.41) | 0.56 (0.38, 0.72) |
| cholate                                 | 25 | 2.15 (0.29, 15.88) | 1.53 (0.09, 25.39) | 0.34 (0.10, 0.71) | 60 | 2.69 (0.52, 13.95) | 2.41 (0.38, 15.12) | 0.45 (0.26, 0.65) | 57 | 1.94 (0.51, 7.45) | 2.74 (1.06, 7.11) | 0.67 (0.51, 0.79) |
| cholesterol                             | 60 | 0.12 (0.10, 0.15)  | 0.17 (0.15, 0.20)  | 0.66 (0.51, 0.79) | 60 | 0.12 (0.10, 0.15)  | 0.17 (0.15, 0.20)  | 0.66 (0.51, 0.79) | 58 | 0.10 (0.08, 0.12) | 0.18 (0.16, 0.20) | 0.75 (0.63, 0.85) |
| choline                                 | 60 | 0.11 (0.09, 0.13)  | 0.13 (0.11, 0.15)  | 0.60 (0.43, 0.75) | 60 | 0.11 (0.09, 0.13)  | 0.13 (0.11, 0.15)  | 0.60 (0.43, 0.75) | 60 | 0.11 (0.09, 0.13) | 0.13 (0.11, 0.15) | 0.60 (0.43, 0.75) |
| cis-aconitate                           | 60 | 0.19 (0.15, 0.24)  | 0.25 (0.22, 0.30)  | 0.64 (0.48, 0.77) | 60 | 0.19 (0.15, 0.24)  | 0.25 (0.22, 0.30)  | 0.64 (0.48, 0.77) | 59 | 0.17 (0.14, 0.21) | 0.26 (0.22, 0.30) | 0.69 (0.54, 0.80) |
| citrate                                 | 60 | 0.18 (0.15, 0.23)  | 0.14 (0.11, 0.19)  | 0.37 (0.19, 0.60) | 60 | 0.18 (0.15, 0.23)  | 0.14 (0.11, 0.19)  | 0.37 (0.19, 0.60) | 60 | 0.18 (0.15, 0.23) | 0.14 (0.11, 0.19) | 0.37 (0.19, 0.60) |
| citrulline                              | 58 | 0.11 (0.09, 0.13)  | 0.26 (0.24, 0.29)  | 0.86 (0.78, 0.91) | 60 | 0.11 (0.09, 0.14)  | 0.28 (0.26, 0.30)  | 0.86 (0.78, 0.91) | 59 | 0.10 (0.08, 0.12) | 0.26 (0.24, 0.28) | 0.87 (0.80, 0.92) |
| cortisol                                | 60 | 0.27 (0.21, 0.35)  | 0.24 (0.18, 0.32)  | 0.44 (0.25, 0.64) | 60 | 0.27 (0.21, 0.35)  | 0.24 (0.18, 0.32)  | 0.44 (0.25, 0.64) | 60 | 0.27 (0.21, 0.35) | 0.24 (0.18, 0.32) | 0.44 (0.25, 0.64) |
| cortisone                               | 54 | 0.18 (0.14, 0.22)  | 0.13 (0.10, 0.18)  | 0.36 (0.17, 0.61) | 60 | 0.19 (0.15, 0.24)  | 0.15 (0.12, 0.20)  | 0.39 (0.20, 0.61) | 60 | 0.19 (0.15, 0.24) | 0.15 (0.12, 0.20) | 0.39 (0.20, 0.61) |
| cotinine                                | 6  | 0.14 (0.07, 0.27)  | 0.35 (0.27, 0.46)  | 0.87 (0.55, 0.97) | 60 | 0.15 (0.12, 0.20)  | 0.75 (0.71, 0.79)  | 0.96 (0.94, 0.98) | 57 | 0.07 (0.05, 0.09) | 0.65 (0.63, 0.66) | 0.99 (0.98, 0.99) |
| creatine                                | 60 | 0.27 (0.21, 0.35)  | 0.47 (0.41, 0.55)  | 0.75 (0.63, 0.85) | 60 | 0.27 (0.21, 0.35)  | 0.47 (0.41, 0.55)  | 0.75 (0.63, 0.85) | 59 | 0.24 (0.18, 0.30) | 0.46 (0.41, 0.53) | 0.79 (0.69, 0.87) |
| creatinine                              | 59 | 0.10 (0.08, 0.12)  | 0.21 (0.20, 0.23)  | 0.83 (0.74, 0.90) | 60 | 0.12 (0.10, 0.14)  | 0.20 (0.18, 0.23)  | 0.75 (0.62, 0.84) | 59 | 0.10 (0.08, 0.12) | 0.21 (0.20, 0.23) | 0.83 (0.74, 0.90) |
| cyclo(leu-pro)                          | 20 | 0.42 (0.26, 0.66)  | .(,..)             | 0.00 (,..)        | 60 | 0.51 (0.36, 0.72)  | 0.18 (0.07, 0.47)  | 0.11 (0.01, 0.61) | 58 | 0.37 (0.28, 0.50) | 0.22 (0.14, 0.36) | 0.26 (0.09, 0.55) |
| cysteine                                | 60 | 0.22 (0.18, 0.28)  | 0.20 (0.15, 0.25)  | 0.44 (0.26, 0.64) | 60 | 0.22 (0.18, 0.28)  | 0.20 (0.15, 0.25)  | 0.44 (0.26, 0.64) | 60 | 0.22 (0.18, 0.28) | 0.20 (0.15, 0.25) | 0.44 (0.26, 0.64) |
| cysteine-glutathione disulfide          | 58 | 0.21 (0.16, 0.26)  | 0.43 (0.38, 0.48)  | 0.81 (0.71, 0.89) | 60 | 0.22 (0.17, 0.28)  | 0.43 (0.38, 0.48)  | 0.79 (0.68, 0.87) | 59 | 0.21 (0.16, 0.26) | 0.44 (0.39, 0.49) | 0.82 (0.72, 0.89) |
| decanoylcarnitine                       | 60 | 0.29 (0.22, 0.40)  | 0.66 (0.58, 0.75)  | 0.83 (0.74, 0.90) | 60 | 0.29 (0.22, 0.40)  | 0.66 (0.58, 0.75)  | 0.83 (0.74, 0.90) | 59 | 0.25 (0.19, 0.34) | 0.65 (0.58, 0.73) | 0.87 (0.79, 0.92) |
| dehydroisoandrosterone sulfate (DHEA-S) | 60 | 0.20 (0.15, 0.28)  | 0.93 (0.87, 1.00)  | 0.96 (0.93, 0.97) | 60 | 0.20 (0.15, 0.28)  | 0.93 (0.87, 1.00)  | 0.96 (0.93, 0.97) | 58 | 0.15 (0.12, 0.20) | 0.72 (0.68, 0.76) | 0.96 (0.93, 0.97) |
| deoxycarnitine                          | 59 | 0.09 (0.08, 0.11)  | 0.17 (0.15, 0.19)  | 0.77 (0.65, 0.86) | 60 | 0.09 (0.08, 0.11)  | 0.17 (0.16, 0.19)  | 0.77 (0.65, 0.86) | 60 | 0.09 (0.08, 0.11) | 0.17 (0.16, 0.19) | 0.77 (0.65, 0.86) |
| deoxycholate                            | 17 | 1.27 (0.29, 5.54)  | 1.00 (0.15, 6.51)  | 0.38 (0.10, 0.78) | 60 | 1.31 (0.59, 2.93)  | 1.02 (0.36, 2.87)  | 0.38 (0.19, 0.60) | 59 | 0.76 (0.46, 1.24) | 0.59 (0.31, 1.10) | 0.37 (0.19, 0.60) |
| desmethylnaproxen sulfate*              | 4  | 0.54 (0.12, 2.40)  | 0.63 (0.18, 2.26)  | 0.58 (0.09, 0.95) | 60 | 1.80 (0.52, 6.21)  | 2.66 (1.15, 6.15)  | 0.68 (0.54, 0.80) | 57 | 1.03 (0.36, 2.92) | 3.21 (2.30, 4.49) | 0.91 (0.85, 0.94) |
| dihomo-linoleate (20:2n6)               | 60 | 0.30 (0.23, 0.38)  | 0.31 (0.24, 0.40)  | 0.52 (0.34, 0.69) | 60 | 0.30 (0.23, 0.38)  | 0.31 (0.24, 0.40)  | 0.52 (0.34, 0.69) | 60 | 0.30 (0.23, 0.38) | 0.31 (0.24, 0.40) | 0.52 (0.34, 0.69) |
| dihomo-linolenate (20:3n3 or n6)        | 60 | 0.16 (0.13, 0.20)  | 0.23 (0.20, 0.26)  | 0.67 (0.51, 0.79) | 60 | 0.16 (0.13, 0.20)  | 0.23 (0.20, 0.26)  | 0.67 (0.51, 0.79) | 60 | 0.16 (0.13, 0.20) | 0.23 (0.20, 0.26) | 0.67 (0.51, 0.79) |
| dimethylarginine (SDMA + ADMA)          | 60 | 0.18 (0.15, 0.22)  | 0.13 (0.10, 0.17)  | 0.34 (0.16, 0.58) | 60 | 0.18 (0.15, 0.22)  | 0.13 (0.10, 0.17)  | 0.34 (0.16, 0.58) | 59 | 0.16 (0.13, 0.20) | 0.12 (0.09, 0.16) | 0.35 (0.17, 0.59) |
| dimethylglycine                         | 52 | 0.24 (0.19, 0.32)  | 0.31 (0.26, 0.38)  | 0.62 (0.45, 0.77) | 60 | 0.29 (0.22, 0.37)  | 0.32 (0.25, 0.40)  | 0.55 (0.38, 0.72) | 59 | 0.27 (0.21, 0.35) | 0.34 (0.28, 0.42) | 0.62 (0.45, 0.76) |
| docosahexaenoate (DHA; 22:6n3)          | 60 | 0.20 (0.16, 0.25)  | 0.41 (0.37, 0.46)  | 0.81 (0.71, 0.88) | 60 | 0.20 (0.16, 0.25)  | 0.41 (0.37, 0.46)  | 0.81 (0.71, 0.88) | 60 | 0.20 (0.16, 0.25) | 0.41 (0.37, 0.46) | 0.81 (0.71, 0.88) |
| docosapentaenoate (n3 DPA; 22:5n3)      | 60 | 0.30 (0.23, 0.39)  | 0.41 (0.34, 0.50)  | 0.66 (0.50, 0.78) | 60 | 0.30 (0.23, 0.39)  | 0.41 (0.34, 0.50)  | 0.66 (0.50, 0.78) | 59 | 0.27 (0.21, 0.35) | 0.39 (0.33, 0.47) | 0.67 (0.52, 0.80) |
| docosapentaenoate (n6 DPA; 22:5n6)      | 59 | 0.21 (0.17, 0.27)  | 0.31 (0.27, 0.37)  | 0.69 (0.54, 0.80) | 60 | 0.21 (0.17, 0.27)  | 0.32 (0.28, 0.38)  | 0.66 (0.55, 0.81) | 59 | 0.19 (0.15, 0.23) | 0.32 (0.29, 0.37) | 0.75 (0.63, 0.85) |
| dodecanedioate                          | 23 | 0.27 (0.18, 0.40)  | 0.16 (0.09, 0.31)  | 0.27 (0.05, 0.72) | 60 | 0.66 (0.44, 1.01)  | 0.24 (0.08, 0.76)  | 0.12 (0.01, 0.60) | 59 | 0.63 (0.42, 0.95) | 0.36 (0.17, 0.74) | 0.24 (0.08, 0.54) |
| DSGEGDFXAEAGGGVR*                       | 60 | 0.22 (0.17, 0.27)  | 0.17 (0.13, 0.23)  | 0.39 (0.20, 0.61) | 60 | 0.22 (0.17, 0.27)  | 0.17 (0.13, 0.23)  | 0.39 (0.20, 0.61) | 60 | 0.22 (0.17, 0.27) | 0.17 (0.13, 0.23) | 0.39 (0.20, 0.61) |
| ecosapentaenoate (EPA; 20:5n3)          | 60 | 0.20 (0.16, 0.26)  | 0.59 (0.54, 0.64)  | 0.89 (0.83, 0.93) | 60 | 0.20 (0.16, 0.26)  | 0.59 (0.54, 0.64)  | 0.89 (0.83, 0.93) | 58 | 0.18 (0.14, 0.23) | 0.55 (0.50, 0.59) | 0.90 (0.84, 0.94) |
| eicosenoate (20:1n9 or 11)              | 60 | 0.32 (0.24, 0.41)  | 0.31 (0.24, 0.41)  | 0.50 (0.31, 0.68) | 60 | 0.32 (0.24, 0.41)  | 0.31 (0.24, 0.41)  | 0.50 (0.31, 0.68) | 60 | 0.32 (0.24, 0.41) | 0.31 (0.24, 0.41) | 0.50 (0.31, 0.68) |

|                                |    |                     |                     |                   |    |                     |                      |                   |    |                    |                    |                   |
|--------------------------------|----|---------------------|---------------------|-------------------|----|---------------------|----------------------|-------------------|----|--------------------|--------------------|-------------------|
| epiandrosterone sulfate        | 56 | 0.36 (0.27, 0.49)   | 0.47 (0.37, 0.59)   | 0.63 (0.46, 0.77) | 60 | 0.37 (0.27, 0.50)   | 0.51 (0.41, 0.64)    | 0.66 (0.50, 0.78) | 59 | 0.24 (0.18, 0.31)  | 0.56 (0.50, 0.63)  | 0.84 (0.76, 0.90) |
| erythritol                     | 60 | 0.15 (0.13, 0.19)   | 0.30 (0.27, 0.33)   | 0.79 (0.68, 0.87) | 60 | 0.15 (0.13, 0.19)   | 0.30 (0.27, 0.33)    | 0.79 (0.68, 0.87) | 59 | 0.14 (0.11, 0.18)  | 0.30 (0.27, 0.33)  | 0.81 (0.71, 0.89) |
| erythronate*                   | 60 | 0.14 (0.12, 0.17)   | 0.28 (0.26, 0.31)   | 0.80 (0.69, 0.88) | 60 | 0.14 (0.12, 0.17)   | 0.28 (0.26, 0.31)    | 0.80 (0.69, 0.88) | 60 | 0.14 (0.12, 0.17)  | 0.28 (0.26, 0.31)  | 0.80 (0.69, 0.88) |
| erythrose                      | 56 | 0.36 (0.27, 0.48)   | 0.06 (0.01, 0.32)   | 0.03 (0.00, 1.00) | 60 | 0.41 (0.30, 0.54)   | 0.10 (0.03, 0.33)    | 0.06 (0.00, 0.84) | 60 | 0.41 (0.30, 0.54)  | 0.10 (0.03, 0.33)  | 0.06 (0.00, 0.84) |
| fructose                       | 60 | 0.55 (0.38, 0.79)   | 0.22 (0.09, 0.54)   | 0.14 (0.02, 0.56) | 60 | 0.55 (0.38, 0.79)   | 0.22 (0.09, 0.54)    | 0.14 (0.02, 0.56) | 58 | 0.41 (0.30, 0.55)  | 0.30 (0.20, 0.46)  | 0.36 (0.18, 0.60) |
| gamma-CEHC                     | 48 | 0.33 (0.24, 0.44)   | 0.29 (0.21, 0.41)   | 0.44 (0.23, 0.66) | 60 | 0.35 (0.26, 0.46)   | 0.41 (0.32, 0.52)    | 0.58 (0.41, 0.73) | 60 | 0.35 (0.26, 0.46)  | 0.41 (0.32, 0.52)  | 0.58 (0.41, 0.73) |
| gamma-glutamylalanine          | 60 | 0.29 (0.23, 0.38)   | 0.31 (0.24, 0.39)   | 0.53 (0.35, 0.70) | 60 | 0.29 (0.23, 0.38)   | 0.31 (0.24, 0.39)    | 0.53 (0.35, 0.70) | 60 | 0.29 (0.23, 0.38)  | 0.31 (0.24, 0.39)  | 0.53 (0.35, 0.70) |
| gamma-glutamylglutamate        | 14 | 0.26 (0.16, 0.42)   | 0.04 (0.00, 0.78)   | 0.03 (0.00, 1.00) | 60 | 0.39 (0.31, 0.51)   | .(,.)                | 0.00 (,.)         | 60 | 0.39 (0.31, 0.51)  | .(,.)              | 0.00 (,.)         |
| gamma-glutamylglutamine        | 60 | 0.14 (0.12, 0.17)   | 0.17 (0.14, 0.20)   | 0.59 (0.42, 0.74) | 60 | 0.14 (0.12, 0.17)   | 0.17 (0.14, 0.20)    | 0.59 (0.42, 0.74) | 59 | 0.13 (0.11, 0.16)  | 0.18 (0.15, 0.21)  | 0.64 (0.49, 0.78) |
| gamma-glutamylisoleucine*      | 55 | 0.22 (0.17, 0.28)   | 0.23 (0.18, 0.29)   | 0.52 (0.34, 0.70) | 60 | 0.22 (0.17, 0.27)   | 0.26 (0.22, 0.32)    | 0.59 (0.42, 0.74) | 60 | 0.22 (0.17, 0.27)  | 0.26 (0.22, 0.32)  | 0.59 (0.42, 0.74) |
| gamma-glutamylleucine          | 60 | 0.14 (0.12, 0.18)   | 0.23 (0.20, 0.26)   | 0.72 (0.59, 0.83) | 60 | 0.14 (0.12, 0.18)   | 0.23 (0.20, 0.26)    | 0.72 (0.59, 0.83) | 59 | 0.13 (0.10, 0.16)  | 0.21 (0.18, 0.23)  | 0.72 (0.58, 0.83) |
| gamma-glutamylmethionine       | 51 | 0.27 (0.21, 0.35)   | 0.11 (0.05, 0.21)   | 0.13 (0.01, 0.62) | 60 | 0.32 (0.25, 0.41)   | 0.18 (0.11, 0.28)    | 0.24 (0.08, 0.54) | 59 | 0.30 (0.24, 0.39)  | 0.18 (0.12, 0.28)  | 0.27 (0.10, 0.55) |
| gamma-glutamylphenylalanine    | 60 | 0.25 (0.20, 0.32)   | 0.07 (0.03, 0.16)   | 0.07 (0.00, 0.81) | 60 | 0.25 (0.20, 0.32)   | 0.07 (0.03, 0.16)    | 0.07 (0.00, 0.81) | 60 | 0.25 (0.20, 0.32)  | 0.07 (0.03, 0.16)  | 0.07 (0.00, 0.81) |
| gamma-glutamylthreonine*       | 51 | 0.30 (0.23, 0.39)   | 0.23 (0.17, 0.33)   | 0.39 (0.19, 0.63) | 60 | 0.31 (0.24, 0.40)   | 0.27 (0.20, 0.36)    | 0.42 (0.24, 0.63) | 60 | 0.31 (0.24, 0.40)  | 0.27 (0.20, 0.36)  | 0.42 (0.24, 0.63) |
| gamma-glutamyltyrosine         | 59 | 0.17 (0.14, 0.21)   | 0.18 (0.15, 0.22)   | 0.52 (0.34, 0.70) | 60 | 0.18 (0.14, 0.22)   | 0.19 (0.16, 0.23)    | 0.54 (0.36, 0.71) | 60 | 0.18 (0.14, 0.22)  | 0.19 (0.16, 0.23)  | 0.54 (0.36, 0.71) |
| gamma-glutamylvaline           | 60 | 0.19 (0.15, 0.23)   | 0.18 (0.15, 0.23)   | 0.48 (0.30, 0.67) | 60 | 0.19 (0.15, 0.23)   | 0.18 (0.15, 0.23)    | 0.48 (0.30, 0.67) | 60 | 0.19 (0.15, 0.23)  | 0.18 (0.15, 0.23)  | 0.48 (0.30, 0.67) |
| gamma-tocopherol               | 39 | 0.35 (0.24, 0.49)   | 0.34 (0.24, 0.48)   | 0.49 (0.27, 0.71) | 60 | 0.48 (0.34, 0.69)   | 0.48 (0.34, 0.69)    | 0.50 (0.32, 0.68) | 59 | 0.47 (0.33, 0.67)  | 0.54 (0.40, 0.73)  | 0.57 (0.39, 0.73) |
| gluconate                      | 59 | 0.27 (0.21, 0.35)   | 0.15 (0.09, 0.23)   | 0.23 (0.07, 0.54) | 60 | 0.27 (0.22, 0.35)   | 0.16 (0.11, 0.24)    | 0.26 (0.09, 0.54) | 60 | 0.27 (0.22, 0.35)  | 0.16 (0.11, 0.24)  | 0.26 (0.09, 0.54) |
| glucose                        | 60 | 0.10 (0.08, 0.12)   | 0.12 (0.11, 0.15)   | 0.61 (0.45, 0.75) | 60 | 0.10 (0.08, 0.12)   | 0.12 (0.11, 0.15)    | 0.61 (0.45, 0.75) | 60 | 0.10 (0.08, 0.12)  | 0.12 (0.11, 0.15)  | 0.61 (0.45, 0.75) |
| glutamate                      | 60 | 0.27 (0.21, 0.35)   | 0.23 (0.18, 0.31)   | 0.42 (0.24, 0.63) | 60 | 0.27 (0.21, 0.35)   | 0.23 (0.18, 0.31)    | 0.42 (0.24, 0.63) | 58 | 0.21 (0.17, 0.26)  | 0.18 (0.14, 0.23)  | 0.44 (0.25, 0.64) |
| glutamine                      | 60 | 0.09 (0.07, 0.11)   | 0.10 (0.08, 0.12)   | 0.54 (0.36, 0.71) | 60 | 0.09 (0.07, 0.11)   | 0.10 (0.08, 0.12)    | 0.54 (0.36, 0.71) | 60 | 0.09 (0.07, 0.11)  | 0.10 (0.08, 0.12)  | 0.54 (0.36, 0.71) |
| glutaroyl carnitine            | 60 | 0.16 (0.13, 0.20)   | 0.22 (0.19, 0.26)   | 0.66 (0.51, 0.79) | 60 | 0.16 (0.13, 0.20)   | 0.22 (0.19, 0.26)    | 0.66 (0.51, 0.79) | 59 | 0.15 (0.12, 0.18)  | 0.24 (0.21, 0.27)  | 0.72 (0.58, 0.82) |
| glycerate                      | 60 | 0.29 (0.23, 0.38)   | 0.20 (0.14, 0.29)   | 0.32 (0.14, 0.57) | 60 | 0.29 (0.23, 0.38)   | 0.20 (0.14, 0.29)    | 0.32 (0.14, 0.57) | 59 | 0.19 (0.16, 0.24)  | 0.18 (0.14, 0.23)  | 0.46 (0.28, 0.66) |
| glycerol                       | 60 | 0.28 (0.22, 0.37)   | 0.37 (0.30, 0.45)   | 0.63 (0.47, 0.77) | 60 | 0.28 (0.22, 0.37)   | 0.37 (0.30, 0.45)    | 0.63 (0.47, 0.77) | 59 | 0.22 (0.17, 0.28)  | 0.36 (0.31, 0.41)  | 0.72 (0.59, 0.83) |
| glycerol 3-phosphate (G3P)     | 59 | -8.21 (-892, -0.08) | .(,.)               | 0.00 (,.)         | 60 | -8.10 (-794, -0.08) | .(,.)                | 0.00 (,.)         | 59 | 1.13 (0.57, 2.24)  | 0.57 (0.15, 2.21)  | 0.20 (0.05, 0.54) |
| glycerophosphorylcholine (GPC) | 60 | 0.28 (0.22, 0.36)   | 0.25 (0.18, 0.33)   | 0.43 (0.24, 0.64) | 60 | 0.28 (0.22, 0.36)   | 0.25 (0.18, 0.33)    | 0.43 (0.24, 0.64) | 58 | 0.22 (0.17, 0.27)  | 0.25 (0.20, 0.30)  | 0.57 (0.39, 0.73) |
| glycine                        | 60 | 0.16 (0.13, 0.19)   | 0.22 (0.19, 0.26)   | 0.66 (0.51, 0.79) | 60 | 0.16 (0.13, 0.19)   | 0.22 (0.19, 0.26)    | 0.66 (0.51, 0.79) | 59 | 0.14 (0.11, 0.17)  | 0.22 (0.19, 0.25)  | 0.72 (0.58, 0.82) |
| glycochenodeoxycholate         | 59 | 0.94 (0.50, 1.78)   | 1.09 (0.63, 1.89)   | 0.57 (0.40, 0.73) | 60 | 0.97 (0.51, 1.85)   | 1.12 (0.64, 1.96)    | 0.57 (0.40, 0.73) | 58 | 0.83 (0.45, 1.52)  | 1.26 (0.85, 1.87)  | 0.70 (0.55, 0.81) |
| glycocholate                   | 47 | 1.11 (0.48, 2.54)   | 1.34 (0.67, 2.66)   | 0.59 (0.40, 0.76) | 60 | 1.22 (0.54, 2.73)   | 1.50 (0.78, 2.89)    | 0.60 (0.44, 0.75) | 58 | 0.79 (0.43, 1.45)  | 1.36 (0.95, 1.93)  | 0.75 (0.62, 0.84) |
| glycochenolate sulfate*        | 59 | 0.25 (0.20, 0.32)   | 0.41 (0.35, 0.48)   | 0.72 (0.59, 0.83) | 60 | 0.26 (0.20, 0.33)   | 0.40 (0.34, 0.47)    | 0.71 (0.57, 0.82) | 60 | 0.26 (0.20, 0.33)  | 0.40 (0.34, 0.47)  | 0.71 (0.57, 0.82) |
| glycodeoxycholate              | 27 | 0.72 (0.27, 1.91)   | 1.88 (1.29, 2.73)   | 0.87 (0.75, 0.94) | 60 | 0.87 (0.41, 1.85)   | 2.13 (1.56, 2.90)    | 0.86 (0.77, 0.91) | 58 | 0.69 (0.33, 1.45)  | 2.32 (1.86, 2.90)  | 0.92 (0.87, 0.95) |
| glycolate (hydroxyacetate)     | 53 | 0.28 (0.22, 0.36)   | 0.15 (0.10, 0.25)   | 0.23 (0.07, 0.56) | 60 | 0.31 (0.24, 0.40)   | 0.17 (0.11, 0.27)    | 0.24 (0.08, 0.54) | 60 | 0.31 (0.24, 0.40)  | 0.17 (0.11, 0.27)  | 0.24 (0.08, 0.54) |
| glycolithocholate sulfate*     | 58 | 0.57 (0.37, 0.88)   | 0.79 (0.58, 1.08)   | 0.66 (0.50, 0.79) | 60 | 0.57 (0.38, 0.87)   | 0.78 (0.58, 1.06)    | 0.65 (0.50, 0.78) | 60 | 0.57 (0.38, 0.87)  | 0.78 (0.58, 1.06)  | 0.65 (0.50, 0.78) |
| glycylphenylalanine            | 19 | 0.22 (0.15, 0.32)   | 0.12 (0.06, 0.24)   | 0.23 (0.03, 0.77) | 60 | 0.22 (0.18, 0.28)   | 0.29 (0.24, 0.34)    | 0.63 (0.47, 0.77) | 58 | 0.19 (0.15, 0.24)  | 0.28 (0.25, 0.33)  | 0.70 (0.55, 0.81) |
| guanosine                      | 58 | 0.18 (0.15, 0.23)   | 0.31 (0.28, 0.36)   | 0.75 (0.62, 0.84) | 60 | 0.19 (0.15, 0.23)   | 0.33 (0.29, 0.37)    | 0.76 (0.63, 0.85) | 59 | 0.18 (0.14, 0.22)  | 0.34 (0.30, 0.38)  | 0.79 (0.68, 0.87) |
| heme*                          | 60 | 0.71 (0.45, 1.10)   | 0.22 (0.05, 0.91)   | 0.09 (0.00, 0.70) | 60 | 0.71 (0.45, 1.10)   | 0.22 (0.05, 0.91)    | 0.09 (0.00, 0.70) | 58 | 0.43 (0.31, 0.58)  | 0.24 (0.14, 0.42)  | 0.24 (0.08, 0.54) |
| heptanoate (7:0)               | 60 | 0.19 (0.16, 0.24)   | 0.17 (0.13, 0.21)   | 0.43 (0.24, 0.63) | 60 | 0.19 (0.16, 0.24)   | 0.17 (0.13, 0.21)    | 0.43 (0.24, 0.63) | 60 | 0.19 (0.16, 0.24)  | 0.17 (0.13, 0.21)  | 0.43 (0.24, 0.63) |
| hexadecanedioate               | 57 | 0.29 (0.22, 0.37)   | 0.33 (0.26, 0.42)   | 0.57 (0.40, 0.73) | 60 | 0.30 (0.23, 0.38)   | 0.35 (0.28, 0.44)    | 0.58 (0.41, 0.74) | 59 | 0.29 (0.22, 0.37)  | 0.35 (0.28, 0.43)  | 0.60 (0.43, 0.75) |
| hexanoylcarnitine              | 60 | 0.26 (0.20, 0.35)   | 0.68 (0.61, 0.76)   | 0.87 (0.80, 0.92) | 60 | 0.26 (0.20, 0.35)   | 0.68 (0.61, 0.76)    | 0.87 (0.80, 0.92) | 59 | 0.23 (0.17, 0.31)  | 0.71 (0.65, 0.78)  | 0.90 (0.84, 0.94) |
| hippurate                      | 60 | 0.98 (0.54, 1.78)   | 0.57 (0.20, 1.60)   | 0.25 (0.09, 0.54) | 60 | 0.98 (0.54, 1.78)   | 0.57 (0.20, 1.60)    | 0.25 (0.09, 0.54) | 58 | 0.72 (0.45, 1.17)  | 0.59 (0.33, 1.06)  | 0.40 (0.22, 0.62) |
| histidine                      | 60 | 0.11 (0.09, 0.13)   | 0.10 (0.09, 0.13)   | 0.48 (0.30, 0.67) | 60 | 0.11 (0.09, 0.13)   | 0.10 (0.09, 0.13)    | 0.48 (0.30, 0.67) | 60 | 0.11 (0.09, 0.13)  | 0.10 (0.09, 0.13)  | 0.48 (0.30, 0.67) |
| homocitrulline                 | 56 | 0.35 (0.26, 0.47)   | 0.35 (0.26, 0.47)   | 0.50 (0.31, 0.69) | 60 | 0.36 (0.27, 0.48)   | 0.38 (0.29, 0.50)    | 0.53 (0.36, 0.70) | 59 | 0.32 (0.25, 0.42)  | 0.36 (0.28, 0.46)  | 0.55 (0.37, 0.71) |
| homostachydrine*               | 58 | 0.31 (0.23, 0.40)   | 0.45 (0.37, 0.54)   | 0.68 (0.53, 0.80) | 60 | 0.32 (0.24, 0.43)   | 0.46 (0.38, 0.56)    | 0.68 (0.53, 0.80) | 59 | 0.31 (0.23, 0.41)  | 0.49 (0.41, 0.58)  | 0.71 (0.57, 0.82) |
| HWESASXX*                      | 40 | 0.72 (0.40, 1.28)   | 0.60 (0.30, 1.20)   | 0.41 (0.20, 0.67) | 60 | 0.81 (0.48, 1.37)   | 0.76 (0.43, 1.33)    | 0.47 (0.28, 0.66) | 58 | 0.65 (0.41, 1.04)  | 0.84 (0.58, 1.20)  | 0.63 (0.46, 0.77) |
| hyodeoxycholate                | 22 | 1.03 (0.37, 2.88)   | 0.54 (0.08, 3.84)   | 0.22 (0.03, 0.74) | 60 | 1.64 (0.61, 4.41)   | 1.18 (0.30, 4.67)    | 0.34 (0.16, 0.58) | 59 | 0.91 (0.50, 1.66)  | 0.96 (0.54, 1.70)  | 0.53 (0.35, 0.70) |
| hypoxanthine                   | 42 | 0.30 (0.22, 0.40)   | 0.23 (0.15, 0.34)   | 0.36 (0.16, 0.64) | 60 | 0.34 (0.26, 0.44)   | 0.24 (0.16, 0.35)    | 0.33 (0.15, 0.58) | 59 | 0.31 (0.24, 0.41)  | 0.26 (0.19, 0.36)  | 0.42 (0.23, 0.63) |
| ibuprofen                      | 15 | -3.18 (-137, -0.07) | -2.02 (-753, -0.01) | 0.29 (0.04, 0.80) | 60 | -6.92 (-421, -0.11) | -4.86 (-1691, -0.01) | 0.33 (0.15, 0.58) | 59 | 14.74 (0.00, 87E4) | 27.68 (0.08, 9619) | 0.78 (0.66, 0.86) |
| indoleacetate                  | 60 | 0.20 (0.16, 0.26)   | 0.61 (0.56, 0.66)   | 0.90 (0.84, 0.94) | 60 | 0.20 (0.16, 0.26)   | 0.61 (0.56, 0.66)    | 0.90 (0.84, 0.94) | 59 | 0.17 (0.13, 0.22)  | 0.55 (0.51, 0.59)  | 0.91 (0.86, 0.95) |
| indolelactate                  | 53 | 0.26 (0.20, 0.34)   | 0.28 (0.22, 0.36)   | 0.53 (0.34, 0.71) | 60 | 0.28 (0.22, 0.36)   | 0.34 (0.27, 0.42)    | 0.59 (0.43, 0.74) | 60 | 0.28 (0.22, 0.36)  | 0.34 (0.27, 0.42)  | 0.59 (0.43, 0.74) |
| indolepropionate               | 54 | 0.42 (0.30, 0.60)   | 0.58 (0.45, 0.75)   | 0.65 (0.48, 0.78) | 60 | 0.43 (0.31, 0.61)   | 0.64 (0.50, 0.81)    | 0.68 (0.54, 0.80) | 58 | 0.31 (0.24, 0.42)  | 0.50 (0.42, 0.60)  | 0.72 (0.58, 0.83) |
| inosine                        | 59 | 0.24 (0.19, 0.32)   | 0.51 (0.45, 0.58)   | 0.81 (0.71, 0.88) | 60 | 0.24 (0.19, 0.32)   | 0.52 (0.46, 0.58)    | 0.82 (0.72, 0.89) | 60 | 0.24 (0.19, 0.32)  | 0.52 (0.46, 0.58)  | 0.82 (0.72, 0.89) |
| inositol 1-phosphate (I1P)     | 48 | 0.35 (0.26, 0.47)   | 0.23 (0.15, 0.37)   | 0.31 (0.12, 0.60) | 60 | 0.39 (0.29, 0.52)   | 0.27 (0.18, 0.42)    | 0.33 (0.15, 0.58) | 59 | 0.34 (0.26, 0.45)  | 0.26 (0.18, 0.38)  | 0.37 (0.19, 0.60) |
| isobutyrylcarnitine            | 60 | 0.32 (0.24, 0.42)   | 0.36 (0.28, 0.46)   | 0.56 (0.39, 0.72) | 60 | 0.32 (0.24, 0.42)   | 0.36 (0.28, 0.46)    | 0.56 (0.39, 0.72) | 59 | 0.27 (0.21, 0.34)  | 0.31 (0.25, 0.39)  | 0.58 (0.41, 0.74) |
| isoleucine                     | 60 | 0.09 (0.08, 0.11)   | 0.14 (0.12, 0.16)   | 0.70 (0.55, 0.81) | 60 | 0.09 (0.08, 0.11)   | 0.14 (0.12, 0.16)    | 0.70 (0.55, 0.81) | 59 | 0.08 (0.07, 0.10)  | 0.14 (0.12, 0.16)  | 0.73 (0.60, 0.83) |
| isovalerate                    | 60 | 0.16 (0.13, 0.20)   | 0.17 (0.14, 0.20)   | 0.52 (0.34, 0.69) | 60 | 0.16 (0.13, 0.20)   | 0.17 (0.14, 0.20)    | 0.52 (0.34, 0.69) | 60 | 0.16 (0.13, 0.20)  | 0.17 (0.14, 0.20)  | 0.52 (0.34, 0.69) |
| isovalerylcarnitine            | 60 | 0.23 (0.18, 0.30)   | 0.37 (0.32, 0.43)   | 0.72 (0.58, 0.82) | 60 | 0.23 (0.18, 0.30)   | 0.37 (0.32, 0.43)    | 0.72 (0.58, 0.82) | 60 | 0.23 (0.18, 0.30)  | 0.37 (0.32, 0.43)  | 0.72 (0.58, 0.82) |

|                                            |    |                    |                    |                   |    |                     |                    |                   |    |                     |                      |                   |
|--------------------------------------------|----|--------------------|--------------------|-------------------|----|---------------------|--------------------|-------------------|----|---------------------|----------------------|-------------------|
| kynurenine                                 | 60 | 0.15 (0.13, 0.19)  | 0.16 (0.14, 0.20)  | 0.53 (0.36, 0.70) | 60 | 0.15 (0.13, 0.19)   | 0.16 (0.14, 0.20)  | 0.53 (0.36, 0.70) | 59 | 0.10 (0.08, 0.12)   | 0.18 (0.16, 0.20)    | 0.78 (0.67, 0.86) |
| lactate                                    | 60 | 0.14 (0.12, 0.18)  | 0.15 (0.13, 0.19)  | 0.53 (0.36, 0.70) | 60 | 0.14 (0.12, 0.18)   | 0.15 (0.13, 0.19)  | 0.53 (0.36, 0.70) | 59 | 0.13 (0.11, 0.16)   | 0.16 (0.13, 0.19)    | 0.60 (0.43, 0.75) |
| lathosterol                                | 6  | 0.21 (0.10, 0.43)  | 0.24 (0.13, 0.45)  | 0.57 (0.12, 0.92) | 60 | 0.57 (0.38, 0.85)   | 0.57 (0.38, 0.85)  | 0.50 (0.32, 0.68) | 59 | 0.57 (0.38, 0.85)   | 0.64 (0.44, 0.92)    | 0.56 (0.38, 0.72) |
| laurate (12:0)                             | 60 | 0.14 (0.12, 0.17)  | 0.09 (0.06, 0.12)  | 0.27 (0.10, 0.55) | 60 | 0.14 (0.12, 0.17)   | 0.09 (0.06, 0.12)  | 0.27 (0.10, 0.55) | 60 | 0.14 (0.12, 0.17)   | 0.09 (0.06, 0.12)    | 0.27 (0.10, 0.55) |
| laurylcarnitine                            | 60 | 0.34 (0.26, 0.45)  | 0.37 (0.29, 0.48)  | 0.54 (0.37, 0.71) | 60 | 0.34 (0.26, 0.45)   | 0.37 (0.29, 0.48)  | 0.54 (0.37, 0.71) | 59 | 0.26 (0.21, 0.34)   | 0.37 (0.31, 0.45)    | 0.67 (0.51, 0.79) |
| leucine                                    | 60 | 0.09 (0.07, 0.10)  | 0.13 (0.11, 0.14)  | 0.68 (0.53, 0.80) | 60 | 0.09 (0.07, 0.10)   | 0.13 (0.11, 0.14)  | 0.68 (0.53, 0.80) | 59 | 0.08 (0.06, 0.09)   | 0.12 (0.11, 0.14)    | 0.73 (0.59, 0.83) |
| leucylleucine                              | 15 | 0.30 (0.18, 0.51)  | 0.42 (0.29, 0.62)  | 0.66 (0.36, 0.88) | 60 | 0.65 (0.43, 0.99)   | 0.42 (0.22, 0.81)  | 0.29 (0.12, 0.56) | 60 | 0.65 (0.43, 0.99)   | 0.42 (0.22, 0.81)    | 0.29 (0.12, 0.56) |
| linoleate (18:2n6)                         | 60 | 0.22 (0.17, 0.27)  | 0.18 (0.14, 0.24)  | 0.42 (0.23, 0.63) | 60 | 0.22 (0.17, 0.27)   | 0.18 (0.14, 0.24)  | 0.42 (0.23, 0.63) | 59 | 0.20 (0.16, 0.25)   | 0.18 (0.15, 0.23)    | 0.47 (0.28, 0.66) |
| linolenate [alpha or gamma; (18:3n3 or 6)] | 60 | 0.39 (0.29, 0.53)  | 0.34 (0.24, 0.47)  | 0.42 (0.24, 0.63) | 60 | 0.39 (0.29, 0.53)   | 0.34 (0.24, 0.47)  | 0.42 (0.24, 0.63) | 59 | 0.30 (0.23, 0.39)   | 0.30 (0.23, 0.38)    | 0.49 (0.31, 0.68) |
| lysine                                     | 60 | 0.22 (0.18, 0.27)  | 0.12 (0.08, 0.18)  | 0.23 (0.07, 0.54) | 60 | 0.22 (0.18, 0.27)   | 0.12 (0.08, 0.18)  | 0.23 (0.07, 0.54) | 60 | 0.22 (0.18, 0.27)   | 0.12 (0.08, 0.18)    | 0.23 (0.07, 0.54) |
| malate                                     | 53 | 0.31 (0.23, 0.40)  | 0.19 (0.12, 0.29)  | 0.27 (0.09, 0.57) | 60 | 0.32 (0.25, 0.42)   | 0.22 (0.15, 0.32)  | 0.31 (0.13, 0.57) | 59 | 0.24 (0.19, 0.31)   | 0.18 (0.13, 0.25)    | 0.36 (0.18, 0.60) |
| mannitol                                   | 47 | 13.84 (0.00, 181E) | 11.85 (0.00, 765E) | 0.42 (0.22, 0.66) | 60 | 13.66 (0.00, 56973) | 12.34 (0.00, 125E) | 0.45 (0.27, 0.65) | 57 | 1.92 (0.53, 6.90)   | 2.33 (0.81, 6.68)    | 0.60 (0.42, 0.75) |
| mannose                                    | 60 | 0.16 (0.13, 0.20)  | 0.21 (0.18, 0.24)  | 0.63 (0.47, 0.76) | 60 | 0.16 (0.13, 0.20)   | 0.21 (0.18, 0.24)  | 0.63 (0.47, 0.76) | 59 | 0.15 (0.12, 0.18)   | 0.21 (0.18, 0.24)    | 0.68 (0.53, 0.80) |
| margarate (17:0)                           | 60 | 0.28 (0.22, 0.37)  | 0.30 (0.24, 0.39)  | 0.53 (0.36, 0.70) | 60 | 0.28 (0.22, 0.37)   | 0.30 (0.24, 0.39)  | 0.53 (0.36, 0.70) | 60 | 0.28 (0.22, 0.37)   | 0.30 (0.24, 0.39)    | 0.53 (0.36, 0.70) |
| methionine                                 | 60 | 0.10 (0.09, 0.13)  | 0.12 (0.10, 0.14)  | 0.57 (0.39, 0.72) | 60 | 0.10 (0.09, 0.13)   | 0.12 (0.10, 0.14)  | 0.57 (0.39, 0.72) | 60 | 0.10 (0.09, 0.13)   | 0.12 (0.10, 0.14)    | 0.57 (0.39, 0.72) |
| methyl palmitate                           | 36 | 2.48 (0.39, 15.83) | 0.91 (0.01, 141.2) | 0.12 (0.01, 0.74) | 60 | 2.14 (0.62, 7.40)   | 0.92 (0.05, 16.43) | 0.16 (0.03, 0.55) | 59 | 0.43 (0.31, 0.58)   | 0.33 (0.22, 0.50)    | 0.38 (0.20, 0.61) |
| methylglutaryl carnitine                   | 37 | 0.25 (0.17, 0.37)  | 0.71 (0.63, 0.81)  | 0.89 (0.80, 0.94) | 60 | 0.27 (0.20, 0.37)   | 0.84 (0.76, 0.93)  | 0.91 (0.85, 0.94) | 58 | 0.21 (0.16, 0.29)   | 0.81 (0.75, 0.88)    | 0.94 (0.90, 0.96) |
| metoprolol                                 | 4  | 0.73 (0.07, 8.06)  | 1.69 (0.60, 4.76)  | 0.84 (0.39, 0.98) | 60 | 0.57 (0.36, 0.90)   | 1.06 (0.83, 1.36)  | 0.78 (0.66, 0.86) | 58 | 0.23 (0.17, 0.32)   | 0.79 (0.72, 0.87)    | 0.92 (0.87, 0.95) |
| metoprolol acid metabolite*                | 17 | 1.48 (0.29, 7.64)  | 0.72 (0.03, 20.74) | 0.19 (0.01, 0.82) | 60 | 2.96 (0.52, 16.80)  | 1.62 (0.07, 38.62) | 0.23 (0.07, 0.54) | 59 | -5.65 (-158, -0.20) | -3.23 (-1092, -0.01) | 0.25 (0.08, 0.54) |
| myo-inositol                               | 60 | 0.18 (0.15, 0.23)  | 0.19 (0.15, 0.23)  | 0.52 (0.34, 0.69) | 60 | 0.18 (0.15, 0.23)   | 0.19 (0.15, 0.23)  | 0.52 (0.34, 0.69) | 59 | 0.17 (0.14, 0.21)   | 0.20 (0.17, 0.24)    | 0.59 (0.42, 0.74) |
| myristate (14:0)                           | 60 | 0.19 (0.15, 0.24)  | 0.15 (0.12, 0.20)  | 0.39 (0.21, 0.61) | 60 | 0.19 (0.15, 0.24)   | 0.15 (0.12, 0.20)  | 0.39 (0.21, 0.61) | 60 | 0.19 (0.15, 0.24)   | 0.15 (0.12, 0.20)    | 0.39 (0.21, 0.61) |
| myristoleate (14:1n5)                      | 60 | 0.33 (0.25, 0.44)  | 0.33 (0.25, 0.43)  | 0.50 (0.31, 0.68) | 60 | 0.33 (0.25, 0.44)   | 0.33 (0.25, 0.43)  | 0.50 (0.31, 0.68) | 58 | 0.27 (0.21, 0.34)   | 0.32 (0.26, 0.39)    | 0.59 (0.42, 0.74) |
| N-(2-furoyl)glycine                        | 1  | (. . .)            | (. . .)            | (. . .)           | 60 | 0.03 (0.02, 0.03)   | 0.00 (0.00, .)     | 0.00 (0.00, .)    | 59 | (. . .)             | (. . .)              | (. . .)           |
| N1-methyladenosine                         | 60 | 0.21 (0.17, 0.27)  | 0.16 (0.12, 0.22)  | 0.37 (0.18, 0.60) | 60 | 0.21 (0.17, 0.27)   | 0.16 (0.12, 0.22)  | 0.37 (0.18, 0.60) | 59 | 0.20 (0.16, 0.25)   | 0.18 (0.14, 0.23)    | 0.44 (0.25, 0.64) |
| N2,N2-dimethylguanosine                    | 16 | 0.18 (0.12, 0.27)  | 0.09 (0.04, 0.20)  | 0.19 (0.01, 0.83) | 60 | 0.22 (0.18, 0.28)   | 0.13 (0.09, 0.19)  | 0.25 (0.09, 0.54) | 60 | 0.22 (0.18, 0.28)   | 0.13 (0.09, 0.19)    | 0.25 (0.09, 0.54) |
| N6-acetyllysine                            | 60 | 0.19 (0.15, 0.23)  | 0.22 (0.18, 0.26)  | 0.57 (0.40, 0.73) | 60 | 0.19 (0.15, 0.23)   | 0.22 (0.18, 0.26)  | 0.57 (0.40, 0.73) | 60 | 0.19 (0.15, 0.23)   | 0.22 (0.18, 0.26)    | 0.57 (0.40, 0.73) |
| N6-carbamoylthreonyladenosine              | 23 | 0.14 (0.10, 0.19)  | 0.07 (0.04, 0.14)  | 0.22 (0.03, 0.73) | 60 | 0.18 (0.14, 0.22)   | 0.12 (0.08, 0.16)  | 0.30 (0.13, 0.56) | 58 | 0.14 (0.11, 0.17)   | 0.12 (0.09, 0.15)    | 0.41 (0.22, 0.63) |
| N-acetylalanine                            | 60 | 0.10 (0.09, 0.13)  | 0.18 (0.16, 0.20)  | 0.75 (0.63, 0.85) | 60 | 0.10 (0.09, 0.13)   | 0.18 (0.16, 0.20)  | 0.75 (0.63, 0.85) | 60 | 0.10 (0.09, 0.13)   | 0.18 (0.16, 0.20)    | 0.75 (0.63, 0.85) |
| N-acetyl-beta-alanine                      | 60 | 0.35 (0.27, 0.47)  | 0.26 (0.18, 0.38)  | 0.35 (0.16, 0.59) | 60 | 0.35 (0.27, 0.47)   | 0.26 (0.18, 0.38)  | 0.35 (0.16, 0.59) | 59 | 0.33 (0.25, 0.43)   | 0.27 (0.20, 0.38)    | 0.41 (0.22, 0.62) |
| N-acetylglycine                            | 44 | 0.58 (0.36, 0.92)  | 0.58 (0.37, 0.93)  | 0.50 (0.30, 0.71) | 60 | 0.58 (0.39, 0.86)   | 0.61 (0.42, 0.89)  | 0.53 (0.35, 0.70) | 59 | 0.47 (0.33, 0.67)   | 0.59 (0.45, 0.78)    | 0.62 (0.45, 0.76) |
| N-acetylmethionine                         | 60 | 0.31 (0.24, 0.42)  | 0.50 (0.42, 0.60)  | 0.72 (0.58, 0.82) | 60 | 0.31 (0.24, 0.42)   | 0.50 (0.42, 0.60)  | 0.72 (0.58, 0.82) | 59 | 0.28 (0.22, 0.37)   | 0.45 (0.38, 0.54)    | 0.72 (0.58, 0.83) |
| N-acetylserine                             | 49 | 0.22 (0.17, 0.28)  | 0.20 (0.15, 0.26)  | 0.46 (0.26, 0.68) | 60 | 0.28 (0.22, 0.35)   | 0.24 (0.18, 0.32)  | 0.42 (0.24, 0.63) | 59 | 0.26 (0.20, 0.33)   | 0.26 (0.21, 0.33)    | 0.51 (0.33, 0.69) |
| N-acetylthreonine                          | 49 | 0.18 (0.14, 0.22)  | 0.17 (0.13, 0.21)  | 0.47 (0.27, 0.68) | 60 | 0.20 (0.16, 0.25)   | 0.24 (0.19, 0.29)  | 0.57 (0.40, 0.73) | 60 | 0.20 (0.16, 0.25)   | 0.24 (0.19, 0.29)    | 0.57 (0.40, 0.73) |
| naproxen                                   | 4  | 0.61 (0.11, 3.36)  | 0.84 (0.24, 2.89)  | 0.66 (0.14, 0.96) | 60 | 1.69 (0.51, 5.68)   | 2.83 (1.37, 5.83)  | 0.74 (0.61, 0.84) | 57 | 0.96 (0.38, 2.45)   | 2.79 (2.03, 3.85)    | 0.89 (0.83, 0.94) |
| N-methyl proline                           | 47 | 0.63 (0.36, 1.12)  | 1.22 (0.91, 1.64)  | 0.79 (0.66, 0.88) | 60 | 0.65 (0.39, 1.09)   | 1.26 (0.96, 1.64)  | 0.79 (0.68, 0.87) | 59 | 0.65 (0.38, 1.12)   | 1.40 (1.09, 1.80)    | 0.82 (0.73, 0.89) |
| nonadecanoate (19:0)                       | 60 | 0.26 (0.20, 0.33)  | 0.23 (0.18, 0.30)  | 0.44 (0.26, 0.65) | 60 | 0.26 (0.20, 0.33)   | 0.23 (0.18, 0.30)  | 0.44 (0.26, 0.65) | 60 | 0.26 (0.20, 0.33)   | 0.23 (0.18, 0.30)    | 0.44 (0.26, 0.65) |
| octadecanedioate                           | 51 | 0.32 (0.24, 0.43)  | 0.28 (0.20, 0.39)  | 0.44 (0.24, 0.66) | 60 | 0.39 (0.29, 0.53)   | 0.30 (0.20, 0.44)  | 0.37 (0.19, 0.60) | 60 | 0.39 (0.29, 0.53)   | 0.30 (0.20, 0.44)    | 0.37 (0.19, 0.60) |
| octanoylcarnitine                          | 60 | 0.38 (0.26, 0.53)  | 0.85 (0.73, 1.00)  | 0.84 (0.75, 0.90) | 60 | 0.38 (0.26, 0.53)   | 0.85 (0.73, 1.00)  | 0.84 (0.75, 0.90) | 59 | 0.25 (0.18, 0.35)   | 0.90 (0.82, 0.99)    | 0.93 (0.88, 0.96) |
| oleate (18:1n9)                            | 60 | 0.31 (0.24, 0.40)  | 0.23 (0.16, 0.32)  | 0.35 (0.17, 0.59) | 60 | 0.31 (0.24, 0.40)   | 0.23 (0.16, 0.32)  | 0.35 (0.17, 0.59) | 60 | 0.31 (0.24, 0.40)   | 0.23 (0.16, 0.32)    | 0.35 (0.17, 0.59) |
| oleoylcarnitine                            | 60 | 0.27 (0.21, 0.35)  | 0.29 (0.23, 0.37)  | 0.54 (0.36, 0.70) | 60 | 0.27 (0.21, 0.35)   | 0.29 (0.23, 0.37)  | 0.54 (0.36, 0.70) | 60 | 0.27 (0.21, 0.35)   | 0.29 (0.23, 0.37)    | 0.54 (0.36, 0.70) |
| ornithine                                  | 57 | 0.30 (0.23, 0.39)  | 0.25 (0.19, 0.35)  | 0.42 (0.23, 0.63) | 60 | 0.33 (0.25, 0.43)   | 0.27 (0.19, 0.37)  | 0.40 (0.22, 0.62) | 59 | 0.29 (0.23, 0.38)   | 0.27 (0.21, 0.36)    | 0.46 (0.28, 0.66) |
| p-acetamidophenylglucuronide               | 7  | 8.83 (0.00, 21E6)  | 1.66 (0.00, 13E33) | 0.03 (0.00, 1.00) | 60 | 909.2 (0.00, 5E235) | 592.2 (0.00, .)    | 0.30 (0.12, 0.56) | 59 | 1.79 (0.45, 7.05)   | 3.52 (1.75, 7.07)    | 0.79 (0.69, 0.87) |
| palmitate (16:0)                           | 60 | 0.18 (0.14, 0.22)  | 0.15 (0.12, 0.19)  | 0.41 (0.23, 0.62) | 60 | 0.18 (0.14, 0.22)   | 0.15 (0.12, 0.19)  | 0.41 (0.23, 0.62) | 60 | 0.18 (0.14, 0.22)   | 0.15 (0.12, 0.19)    | 0.41 (0.23, 0.62) |
| palmitoleate (16:1n7)                      | 60 | 0.31 (0.24, 0.41)  | 0.34 (0.27, 0.43)  | 0.54 (0.37, 0.71) | 60 | 0.31 (0.24, 0.41)   | 0.34 (0.27, 0.43)  | 0.54 (0.37, 0.71) | 59 | 0.27 (0.21, 0.35)   | 0.33 (0.27, 0.41)    | 0.60 (0.44, 0.75) |
| palmitoyl sphingomyelin                    | 60 | 0.12 (0.10, 0.15)  | 0.25 (0.23, 0.28)  | 0.82 (0.72, 0.89) | 60 | 0.12 (0.10, 0.15)   | 0.25 (0.23, 0.28)  | 0.82 (0.72, 0.89) | 59 | 0.11 (0.09, 0.13)   | 0.23 (0.21, 0.26)    | 0.83 (0.73, 0.89) |
| palmitoylcarnitine                         | 60 | 0.27 (0.21, 0.34)  | 0.10 (0.05, 0.19)  | 0.11 (0.01, 0.61) | 60 | 0.27 (0.21, 0.34)   | 0.10 (0.05, 0.19)  | 0.11 (0.01, 0.61) | 59 | 0.26 (0.20, 0.33)   | 0.11 (0.06, 0.19)    | 0.15 (0.03, 0.55) |
| pantothenate                               | 50 | 0.24 (0.18, 0.31)  | 0.48 (0.42, 0.55)  | 0.80 (0.69, 0.88) | 60 | 0.26 (0.20, 0.34)   | 0.59 (0.53, 0.67)  | 0.84 (0.75, 0.90) | 59 | 0.23 (0.18, 0.30)   | 0.54 (0.49, 0.61)    | 0.85 (0.76, 0.91) |
| paraxanthine                               | 45 | 0.54 (0.35, 0.84)  | 0.54 (0.35, 0.84)  | 0.50 (0.29, 0.70) | 60 | 0.63 (0.41, 0.98)   | 0.76 (0.53, 1.10)  | 0.59 (0.42, 0.74) | 58 | 0.55 (0.37, 0.83)   | 0.69 (0.50, 0.95)    | 0.61 (0.44, 0.76) |
| p-cresol sulfate                           | 60 | 0.34 (0.26, 0.45)  | 0.36 (0.28, 0.47)  | 0.53 (0.35, 0.70) | 60 | 0.34 (0.26, 0.45)   | 0.36 (0.28, 0.47)  | 0.53 (0.35, 0.70) | 57 | 0.20 (0.16, 0.26)   | 0.42 (0.38, 0.47)    | 0.81 (0.71, 0.89) |
| pelargonate (9:0)                          | 60 | 0.21 (0.17, 0.26)  | 0.18 (0.14, 0.23)  | 0.42 (0.23, 0.63) | 60 | 0.21 (0.17, 0.26)   | 0.18 (0.14, 0.23)  | 0.42 (0.23, 0.63) | 59 | 0.20 (0.16, 0.25)   | 0.17 (0.13, 0.22)    | 0.42 (0.24, 0.63) |
| phenol sulfate                             | 60 | 0.54 (0.34, 0.86)  | 1.14 (0.92, 1.42)  | 0.81 (0.71, 0.89) | 60 | 0.54 (0.34, 0.86)   | 1.14 (0.92, 1.42)  | 0.81 (0.71, 0.89) | 59 | 0.41 (0.28, 0.62)   | 1.07 (0.92, 1.25)    | 0.87 (0.80, 0.92) |
| phenylacetate                              | 25 | 0.52 (0.30, 0.90)  | 0.26 (0.09, 0.78)  | 0.20 (0.02, 0.73) | 60 | 0.57 (0.39, 0.84)   | 0.41 (0.24, 0.70)  | 0.33 (0.15, 0.58) | 59 | 0.43 (0.31, 0.59)   | 0.35 (0.23, 0.52)    | 0.39 (0.21, 0.62) |
| phenylacetylglutamine                      | 60 | 0.32 (0.24, 0.42)  | 0.53 (0.44, 0.63)  | 0.74 (0.61, 0.83) | 60 | 0.32 (0.24, 0.42)   | 0.53 (0.44, 0.63)  | 0.74 (0.61, 0.83) | 57 | 0.22 (0.17, 0.28)   | 0.46 (0.41, 0.52)    | 0.81 (0.71, 0.89) |
| phenylalanine                              | 60 | 0.09 (0.08, 0.11)  | 0.07 (0.06, 0.09)  | 0.37 (0.19, 0.60) | 60 | 0.09 (0.08, 0.11)   | 0.07 (0.06, 0.09)  | 0.37 (0.19, 0.60) | 59 | 0.08 (0.06, 0.09)   | 0.08 (0.07, 0.09)    | 0.50 (0.32, 0.69) |
| phenylacetate (PLA)                        | 48 | 0.50 (0.33, 0.74)  | 0.53 (0.37, 0.78)  | 0.54 (0.34, 0.72) | 60 | 0.55 (0.37, 0.80)   | 0.56 (0.39, 0.82)  | 0.51 (0.33, 0.69) | 58 | 0.25 (0.20, 0.33)   | 0.37 (0.31, 0.44)    | 0.68 (0.53, 0.80) |
| phosphate                                  | 60 | 0.10 (0.08, 0.12)  | 0.16 (0.14, 0.18)  | 0.72 (0.58, 0.82) | 60 | 0.10 (0.08, 0.12)   | 0.16 (0.14, 0.18)  | 0.72 (0.58, 0.82) | 60 | 0.10 (0.08, 0.12)   | 0.16 (0.14, 0.18)    | 0.72 (0.58, 0.82) |

|                              |    |                     |                     |                   |    |                     |                    |                   |    |                   |                   |                   |
|------------------------------|----|---------------------|---------------------|-------------------|----|---------------------|--------------------|-------------------|----|-------------------|-------------------|-------------------|
| pipecolate                   | 60 | 0.77 (0.47, 1.28)   | 0.65 (0.36, 1.18)   | 0.42 (0.23, 0.63) | 60 | 0.77 (0.47, 1.28)   | 0.65 (0.36, 1.18)  | 0.42 (0.23, 0.63) | 57 | 0.45 (0.31, 0.65) | 0.70 (0.56, 0.89) | 0.71 (0.57, 0.82) |
| piperine                     | 56 | 1.36 (0.56, 3.28)   | 1.26 (0.48, 3.26)   | 0.46 (0.27, 0.66) | 60 | 1.39 (0.58, 3.35)   | 1.34 (0.54, 3.33)  | 0.48 (0.30, 0.67) | 58 | 0.74 (0.45, 1.23) | 0.79 (0.49, 1.27) | 0.53 (0.35, 0.70) |
| pregn steroid monosulfate*   | 60 | 0.29 (0.19, 0.44)   | 1.30 (1.19, 1.43)   | 0.95 (0.92, 0.97) | 60 | 0.29 (0.19, 0.44)   | 1.30 (1.19, 1.43)  | 0.95 (0.92, 0.97) | 59 | 0.27 (0.19, 0.37) | 0.85 (0.77, 0.94) | 0.91 (0.85, 0.94) |
| pregnen-diol disulfate*      | 59 | 0.18 (0.11, 0.28)   | 1.56 (1.49, 1.65)   | 0.99 (0.98, 0.99) | 60 | 0.18 (0.11, 0.28)   | 1.58 (1.50, 1.66)  | 0.99 (0.98, 0.99) | 59 | 0.17 (0.12, 0.25) | 1.21 (1.15, 1.28) | 0.98 (0.97, 0.99) |
| pro-hydroxy-pro              | 60 | 0.26 (0.20, 0.34)   | 0.52 (0.46, 0.60)   | 0.80 (0.70, 0.88) | 60 | 0.26 (0.20, 0.34)   | 0.52 (0.46, 0.60)  | 0.80 (0.70, 0.88) | 58 | 0.20 (0.16, 0.26) | 0.51 (0.46, 0.56) | 0.87 (0.79, 0.92) |
| proline                      | 60 | 0.11 (0.09, 0.14)   | 0.23 (0.21, 0.25)   | 0.80 (0.70, 0.88) | 60 | 0.11 (0.09, 0.14)   | 0.23 (0.21, 0.25)  | 0.80 (0.70, 0.88) | 60 | 0.11 (0.09, 0.14) | 0.23 (0.21, 0.25) | 0.80 (0.70, 0.88) |
| propionylcarnitine           | 60 | 0.16 (0.13, 0.20)   | 0.29 (0.26, 0.33)   | 0.76 (0.64, 0.85) | 60 | 0.16 (0.13, 0.20)   | 0.29 (0.26, 0.33)  | 0.76 (0.64, 0.85) | 60 | 0.16 (0.13, 0.20) | 0.29 (0.26, 0.33) | 0.76 (0.64, 0.85) |
| pseudouridine                | 60 | 0.14 (0.11, 0.17)   | 0.16 (0.13, 0.19)   | 0.58 (0.41, 0.73) | 60 | 0.14 (0.11, 0.17)   | 0.16 (0.13, 0.19)  | 0.58 (0.41, 0.73) | 59 | 0.12 (0.10, 0.15) | 0.16 (0.14, 0.19) | 0.62 (0.45, 0.76) |
| pyridoxate                   | 60 | 31.90 (0.00, 287E7) | 12.23 (0.00, 7E21)  | 0.13 (0.02, 0.58) | 60 | 31.90 (0.00, 287E7) | 12.23 (0.00, 7E21) | 0.13 (0.02, 0.58) | 59 | 0.47 (0.29, 0.76) | 1.39 (1.18, 1.64) | 0.90 (0.84, 0.94) |
| pyroglutamine*               | 60 | 0.26 (0.20, 0.35)   | 0.59 (0.52, 0.67)   | 0.83 (0.74, 0.90) | 60 | 0.26 (0.20, 0.35)   | 0.59 (0.52, 0.67)  | 0.83 (0.74, 0.90) | 58 | 0.20 (0.16, 0.26) | 0.56 (0.51, 0.62) | 0.89 (0.82, 0.93) |
| pyroglutamylglycine          | 13 | 0.17 (0.10, 0.27)   | 0.33 (0.26, 0.42)   | 0.80 (0.54, 0.93) | 60 | 0.56 (0.38, 0.82)   | 0.40 (0.23, 0.68)  | 0.34 (0.16, 0.58) | 59 | 0.27 (0.21, 0.35) | 0.40 (0.33, 0.47) | 0.68 (0.53, 0.80) |
| pyruvate                     | 58 | 0.34 (0.26, 0.45)   | 0.26 (0.19, 0.38)   | 0.38 (0.19, 0.61) | 60 | 0.35 (0.26, 0.45)   | 0.26 (0.19, 0.38)  | 0.37 (0.19, 0.60) | 60 | 0.35 (0.26, 0.45) | 0.26 (0.19, 0.38) | 0.37 (0.19, 0.60) |
| quinrate                     | 35 | 0.42 (0.25, 0.70)   | 1.02 (0.83, 1.26)   | 0.86 (0.74, 0.92) | 60 | 0.55 (0.32, 0.94)   | 1.56 (1.29, 1.88)  | 0.89 (0.82, 0.93) | 59 | 0.59 (0.33, 1.04) | 1.71 (1.40, 2.08) | 0.89 (0.83, 0.94) |
| saccharin                    | 11 | 0.88 (0.25, 3.13)   | 0.41 (0.03, 6.40)   | 0.17 (0.00, 0.92) | 60 | 2.83 (0.56, 14.38)  | 0.92 (0.01, 135.2) | 0.10 (0.01, 0.66) | 57 | 1.23 (0.58, 2.60) | 0.58 (0.12, 2.84) | 0.18 (0.04, 0.55) |
| salicylate                   | 55 | 3.06 (0.30, 31.42)  | 5.51 (1.51, 20.08)  | 0.76 (0.64, 0.86) | 60 | 2.53 (0.41, 15.62)  | 4.39 (1.53, 12.54) | 0.75 (0.62, 0.84) | 59 | 0.95 (0.35, 2.53) | 3.15 (2.35, 4.24) | 0.92 (0.87, 0.95) |
| salicylic glucuronide*       | 25 | 0.83 (0.34, 2.00)   | 1.06 (0.53, 2.11)   | 0.62 (0.37, 0.82) | 60 | 1.03 (0.50, 2.10)   | 1.50 (0.92, 2.45)  | 0.68 (0.53, 0.80) | 59 | 0.97 (0.44, 2.15) | 2.09 (1.44, 3.02) | 0.82 (0.72, 0.89) |
| scyllo-inositol              | 54 | 0.24 (0.19, 0.32)   | 0.44 (0.38, 0.51)   | 0.76 (0.63, 0.86) | 60 | 0.27 (0.21, 0.35)   | 0.46 (0.39, 0.53)  | 0.74 (0.61, 0.84) | 60 | 0.27 (0.21, 0.35) | 0.46 (0.39, 0.53) | 0.74 (0.61, 0.84) |
| sebacate (decanedioate)      | 60 | 0.57 (0.39, 0.83)   | 0.16 (0.04, 0.60)   | 0.07 (0.00, 0.76) | 60 | 0.57 (0.39, 0.83)   | 0.16 (0.04, 0.60)  | 0.07 (0.00, 0.76) | 58 | 0.21 (0.17, 0.26) | 0.19 (0.15, 0.25) | 0.47 (0.28, 0.66) |
| serine                       | 60 | 0.20 (0.16, 0.25)   | 0.16 (0.12, 0.21)   | 0.38 (0.20, 0.61) | 60 | 0.20 (0.16, 0.25)   | 0.16 (0.12, 0.21)  | 0.38 (0.20, 0.61) | 60 | 0.20 (0.16, 0.25) | 0.16 (0.12, 0.21) | 0.38 (0.20, 0.61) |
| serotonin (5HT)              | 60 | 0.16 (0.13, 0.20)   | 0.37 (0.33, 0.40)   | 0.84 (0.76, 0.90) | 60 | 0.16 (0.13, 0.20)   | 0.37 (0.33, 0.40)  | 0.84 (0.76, 0.90) | 60 | 0.16 (0.13, 0.20) | 0.37 (0.33, 0.40) | 0.84 (0.76, 0.90) |
| stachydrine                  | 60 | 0.50 (0.34, 0.74)   | 0.84 (0.66, 1.06)   | 0.74 (0.61, 0.84) | 60 | 0.50 (0.34, 0.74)   | 0.84 (0.66, 1.06)  | 0.74 (0.61, 0.84) | 59 | 0.49 (0.33, 0.74) | 0.92 (0.74, 1.14) | 0.78 (0.66, 0.86) |
| stearate (18:0)              | 60 | 0.19 (0.15, 0.23)   | 0.17 (0.13, 0.21)   | 0.44 (0.26, 0.64) | 60 | 0.19 (0.15, 0.23)   | 0.17 (0.13, 0.21)  | 0.44 (0.26, 0.64) | 60 | 0.19 (0.15, 0.23) | 0.17 (0.13, 0.21) | 0.44 (0.26, 0.64) |
| stearidonate (18:4n3)        | 59 | 0.51 (0.35, 0.74)   | 0.54 (0.38, 0.77)   | 0.53 (0.35, 0.70) | 60 | 0.52 (0.36, 0.76)   | 0.56 (0.39, 0.79)  | 0.53 (0.36, 0.70) | 58 | 0.36 (0.27, 0.48) | 0.44 (0.34, 0.56) | 0.60 (0.43, 0.77) |
| stearoyl sphingomyelin       | 60 | 0.23 (0.18, 0.29)   | 0.31 (0.26, 0.37)   | 0.64 (0.48, 0.77) | 60 | 0.23 (0.18, 0.29)   | 0.31 (0.26, 0.37)  | 0.64 (0.48, 0.77) | 60 | 0.23 (0.18, 0.29) | 0.31 (0.26, 0.37) | 0.64 (0.48, 0.77) |
| stearoylcarnitine            | 55 | 0.28 (0.22, 0.36)   | 0.23 (0.17, 0.32)   | 0.41 (0.22, 0.63) | 60 | 0.29 (0.23, 0.38)   | 0.25 (0.18, 0.33)  | 0.41 (0.23, 0.63) | 60 | 0.29 (0.23, 0.38) | 0.25 (0.18, 0.33) | 0.41 (0.23, 0.63) |
| suberate (octanedioate)      | 20 | 0.20 (0.14, 0.29)   | 0.22 (0.16, 0.31)   | 0.55 (0.26, 0.81) | 60 | 0.79 (0.49, 1.29)   | 0.15 (0.01, 1.88)  | 0.04 (0.00, 0.98) | 58 | 0.43 (0.31, 0.59) | 0.37 (0.26, 0.53) | 0.43 (0.24, 0.64) |
| succinate                    | 60 | 0.13 (0.10, 0.15)   | 0.14 (0.12, 0.17)   | 0.56 (0.38, 0.72) | 60 | 0.13 (0.10, 0.15)   | 0.14 (0.12, 0.17)  | 0.56 (0.38, 0.72) | 58 | 0.10 (0.08, 0.12) | 0.15 (0.13, 0.17) | 0.71 (0.56, 0.82) |
| succinylcarnitine            | 59 | 0.17 (0.14, 0.21)   | 0.24 (0.20, 0.28)   | 0.67 (0.51, 0.79) | 60 | 0.17 (0.14, 0.22)   | 0.23 (0.20, 0.28)  | 0.64 (0.49, 0.78) | 60 | 0.17 (0.14, 0.22) | 0.23 (0.20, 0.28) | 0.64 (0.49, 0.78) |
| taurochenodeoxycholate       | 37 | 0.79 (0.42, 1.50)   | 0.48 (0.17, 1.37)   | 0.27 (0.07, 0.63) | 60 | 1.14 (0.56, 2.30)   | 0.84 (0.32, 2.18)  | 0.35 (0.17, 0.59) | 59 | 0.64 (0.41, 1.00) | 0.69 (0.45, 1.04) | 0.53 (0.36, 0.70) |
| taurocholate                 | 10 | -15.1 (-22E9, 0.00) | -4.56 (-1E31, 0.00) | 0.08 (0.00, 1.00) | 60 | 6.97 (0.12, 390.8)  | 3.20 (0.00, 20588) | 0.17 (0.04, 0.54) | 59 | 0.59 (0.38, 0.93) | 0.90 (0.67, 1.21) | 0.70 (0.55, 0.81) |
| taurochenolate sulfate*      | 44 | 0.41 (0.29, 0.59)   | 0.35 (0.23, 0.54)   | 0.42 (0.22, 0.67) | 60 | 0.53 (0.36, 0.77)   | 0.52 (0.36, 0.76)  | 0.49 (0.31, 0.68) | 57 | 0.34 (0.25, 0.46) | 0.50 (0.41, 0.61) | 0.68 (0.53, 0.80) |
| taurodeoxycholate            | 29 | 1.24 (0.40, 3.82)   | 1.15 (0.34, 3.88)   | 0.46 (0.21, 0.73) | 60 | 1.35 (0.57, 3.20)   | 1.38 (0.59, 3.21)  | 0.51 (0.33, 0.69) | 59 | 0.76 (0.44, 1.32) | 1.16 (0.80, 1.66) | 0.70 (0.56, 0.81) |
| tauroolithocholate 3-sulfate | 39 | 0.67 (0.38, 1.17)   | 0.68 (0.39, 1.18)   | 0.51 (0.29, 0.72) | 60 | 0.65 (0.42, 1.02)   | 0.68 (0.44, 1.04)  | 0.52 (0.34, 0.69) | 59 | 0.49 (0.34, 0.72) | 0.64 (0.48, 0.86) | 0.63 (0.47, 0.77) |
| tetradecanedioate            | 54 | 0.40 (0.29, 0.55)   | 0.27 (0.17, 0.43)   | 0.32 (0.13, 0.58) | 60 | 0.41 (0.30, 0.56)   | 0.33 (0.23, 0.48)  | 0.39 (0.21, 0.61) | 59 | 0.39 (0.29, 0.53) | 0.34 (0.24, 0.48) | 0.43 (0.24, 0.64) |
| theobromine                  | 59 | 0.79 (0.48, 1.31)   | 0.40 (0.15, 1.07)   | 0.20 (0.05, 0.54) | 60 | 0.79 (0.48, 1.30)   | 0.41 (0.16, 1.07)  | 0.22 (0.06, 0.53) | 60 | 0.79 (0.48, 1.30) | 0.41 (0.16, 1.07) | 0.22 (0.06, 0.53) |
| theophylline                 | 41 | 0.55 (0.20, 1.48)   | 2.94 (2.44, 3.54)   | 0.97 (0.94, 0.98) | 60 | 0.65 (0.25, 1.75)   | 3.52 (2.93, 4.23)  | 0.97 (0.95, 0.98) | 59 | 0.46 (0.32, 0.68) | 0.78 (0.63, 0.98) | 0.74 (0.61, 0.84) |
| threitol                     | 58 | 0.36 (0.27, 0.47)   | 0.23 (0.15, 0.36)   | 0.30 (0.12, 0.57) | 60 | 0.36 (0.27, 0.48)   | 0.24 (0.16, 0.36)  | 0.30 (0.13, 0.56) | 60 | 0.36 (0.27, 0.48) | 0.24 (0.16, 0.36) | 0.30 (0.13, 0.56) |
| threonate                    | 60 | 0.24 (0.19, 0.30)   | 0.30 (0.25, 0.36)   | 0.61 (0.44, 0.75) | 60 | 0.24 (0.19, 0.30)   | 0.30 (0.25, 0.36)  | 0.61 (0.44, 0.75) | 60 | 0.24 (0.19, 0.30) | 0.30 (0.25, 0.36) | 0.61 (0.44, 0.75) |
| threonine                    | 47 | 0.15 (0.12, 0.20)   | 0.28 (0.25, 0.32)   | 0.77 (0.64, 0.87) | 60 | 0.39 (0.29, 0.52)   | 0.36 (0.27, 0.50)  | 0.47 (0.29, 0.66) | 59 | 0.33 (0.25, 0.43) | 0.37 (0.29, 0.47) | 0.57 (0.39, 0.73) |
| threonylphenylalanine        | 16 | 0.27 (0.19, 0.40)   | (.,.)               | 0.00 (.,.)        | 60 | 0.33 (0.26, 0.43)   | 0.17 (0.10, 0.28)  | 0.20 (0.05, 0.53) | 58 | 0.30 (0.23, 0.39) | 0.20 (0.13, 0.29) | 0.30 (0.12, 0.57) |
| thymol sulfate               | 25 | 0.48 (0.28, 0.81)   | 0.43 (0.24, 0.78)   | 0.45 (0.18, 0.74) | 60 | 0.92 (0.51, 1.67)   | 0.90 (0.49, 1.66)  | 0.49 (0.31, 0.68) | 58 | 0.72 (0.42, 1.22) | 1.05 (0.73, 1.51) | 0.68 (0.53, 0.80) |
| tiglyl carnitine             | 59 | 0.19 (0.15, 0.23)   | 0.24 (0.20, 0.28)   | 0.61 (0.45, 0.76) | 60 | 0.19 (0.15, 0.24)   | 0.24 (0.20, 0.29)  | 0.61 (0.45, 0.76) | 60 | 0.19 (0.15, 0.24) | 0.24 (0.20, 0.29) | 0.61 (0.45, 0.76) |
| trans-4-hydroxyproline       | 55 | 0.53 (0.36, 0.77)   | 0.29 (0.15, 0.57)   | 0.23 (0.07, 0.55) | 60 | 0.55 (0.38, 0.80)   | 0.33 (0.18, 0.62)  | 0.27 (0.10, 0.55) | 59 | 0.46 (0.33, 0.64) | 0.29 (0.17, 0.49) | 0.28 (0.10, 0.55) |
| tryptophan                   | 60 | 0.08 (0.06, 0.09)   | 0.14 (0.12, 0.15)   | 0.77 (0.65, 0.86) | 60 | 0.08 (0.06, 0.09)   | 0.14 (0.12, 0.15)  | 0.77 (0.65, 0.86) | 60 | 0.08 (0.06, 0.09) | 0.14 (0.12, 0.15) | 0.77 (0.65, 0.86) |
| tryptophan betaine           | 57 | 0.39 (0.26, 0.56)   | 0.94 (0.81, 1.10)   | 0.86 (0.77, 0.91) | 60 | 0.39 (0.27, 0.57)   | 0.98 (0.84, 1.14)  | 0.86 (0.78, 0.91) | 59 | 0.42 (0.29, 0.60) | 0.75 (0.62, 0.92) | 0.76 (0.64, 0.85) |
| tyrosine                     | 60 | 0.08 (0.07, 0.10)   | 0.14 (0.13, 0.16)   | 0.74 (0.62, 0.84) | 60 | 0.08 (0.07, 0.10)   | 0.14 (0.13, 0.16)  | 0.74 (0.62, 0.84) | 60 | 0.08 (0.07, 0.10) | 0.14 (0.13, 0.16) | 0.74 (0.62, 0.84) |
| undecanedioate               | 60 | 0.69 (0.45, 1.06)   | 0.04 (0.00, 143.7)  | 0.00 (0.00, 1.00) | 60 | 0.69 (0.45, 1.06)   | 0.04 (0.00, 143.7) | 0.00 (0.00, 1.00) | 59 | 0.17 (0.14, 0.21) | 0.17 (0.14, 0.21) | 0.49 (0.31, 0.68) |
| undecanoate (11:0)           | 58 | 0.13 (0.11, 0.16)   | 0.13 (0.10, 0.16)   | 0.47 (0.29, 0.67) | 60 | 0.14 (0.11, 0.17)   | 0.13 (0.10, 0.16)  | 0.46 (0.28, 0.66) | 60 | 0.14 (0.11, 0.17) | 0.13 (0.10, 0.16) | 0.46 (0.28, 0.66) |
| urate                        | 60 | 0.10 (0.08, 0.12)   | 0.17 (0.15, 0.19)   | 0.74 (0.61, 0.84) | 60 | 0.10 (0.08, 0.12)   | 0.17 (0.15, 0.19)  | 0.74 (0.61, 0.84) | 60 | 0.10 (0.08, 0.12) | 0.17 (0.15, 0.19) | 0.74 (0.61, 0.84) |
| urea                         | 60 | 0.18 (0.14, 0.22)   | 0.17 (0.14, 0.21)   | 0.49 (0.31, 0.68) | 60 | 0.18 (0.14, 0.22)   | 0.17 (0.14, 0.21)  | 0.49 (0.31, 0.68) | 59 | 0.15 (0.13, 0.19) | 0.17 (0.14, 0.20) | 0.54 (0.36, 0.71) |
| uridine                      | 60 | 0.10 (0.08, 0.12)   | 0.13 (0.12, 0.15)   | 0.64 (0.48, 0.77) | 60 | 0.10 (0.08, 0.12)   | 0.13 (0.12, 0.15)  | 0.64 (0.48, 0.77) | 60 | 0.10 (0.08, 0.12) | 0.13 (0.12, 0.15) | 0.64 (0.48, 0.77) |
| urocanate                    | 46 | 0.35 (0.26, 0.48)   | 0.24 (0.15, 0.38)   | 0.31 (0.12, 0.61) | 60 | 0.40 (0.30, 0.54)   | 0.34 (0.24, 0.49)  | 0.42 (0.24, 0.63) | 60 | 0.40 (0.30, 0.54) | 0.34 (0.24, 0.49) | 0.42 (0.24, 0.63) |
| ursodeoxycholate             | 37 | 0.72 (0.34, 1.52)   | 1.49 (1.03, 2.13)   | 0.81 (0.67, 0.90) | 60 | 0.85 (0.42, 1.70)   | 1.84 (1.34, 2.54)  | 0.82 (0.73, 0.89) | 59 | 0.44 (0.29, 0.68) | 1.18 (1.01, 1.39) | 0.88 (0.81, 0.93) |
| valerate                     | 60 | 0.23 (0.18, 0.28)   | 0.16 (0.12, 0.22)   | 0.34 (0.16, 0.58) | 60 | 0.23 (0.18, 0.28)   | 0.16 (0.12, 0.22)  | 0.34 (0.16, 0.58) | 59 | 0.21 (0.17, 0.27) | 0.17 (0.13, 0.23) | 0.40 (0.21, 0.62) |
| valine                       | 60 | 0.06 (0.05, 0.07)   | 0.11 (0.10, 0.12)   | 0.76 (0.63, 0.85) | 60 | 0.06 (0.05, 0.07)   | 0.11 (0.10, 0.12)  | 0.76 (0.63, 0.85) | 60 | 0.06 (0.05, 0.07) | 0.11 (0.10, 0.12) | 0.76 (0.63, 0.85) |
| X- 01911_200                 | 52 | 1.47 (0.55, 3.94)   | 1.40 (0.50, 3.94)   | 0.48 (0.28, 0.68) | 60 | 1.43 (0.58, 3.55)   | 1.42 (0.57, 3.55)  | 0.50 (0.31, 0.68) | 58 | 0.56 (0.37, 0.85) | 0.76 (0.56, 1.03) | 0.65 (0.49, 0.78) |

|              |    |                   |                   |                   |    |                   |                   |                   |    |                   |                   |                   |
|--------------|----|-------------------|-------------------|-------------------|----|-------------------|-------------------|-------------------|----|-------------------|-------------------|-------------------|
| X- 02249_201 | 60 | 0.26 (0.20, 0.34) | 0.39 (0.33, 0.46) | 0.69 (0.54, 0.80) | 60 | 0.26 (0.20, 0.34) | 0.39 (0.33, 0.46) | 0.69 (0.54, 0.80) | 59 | 0.25 (0.19, 0.32) | 0.41 (0.35, 0.48) | 0.73 (0.59, 0.83) |
| X- 02269_201 | 58 | 0.49 (0.32, 0.75) | 1.03 (0.84, 1.26) | 0.81 (0.71, 0.89) | 60 | 0.50 (0.33, 0.77) | 1.05 (0.86, 1.29) | 0.82 (0.72, 0.89) | 59 | 0.25 (0.18, 0.36) | 1.05 (0.96, 1.14) | 0.95 (0.91, 0.97) |
| X- 02973     | 60 | 0.15 (0.12, 0.18) | 0.05 (0.03, 0.09) | 0.12 (0.01, 0.59) | 60 | 0.15 (0.12, 0.18) | 0.05 (0.03, 0.09) | 0.12 (0.01, 0.59) | 60 | 0.15 (0.12, 0.18) | 0.05 (0.03, 0.09) | 0.12 (0.01, 0.59) |
| X- 03003     | 59 | 0.25 (0.20, 0.32) | 0.12 (0.07, 0.19) | 0.18 (0.04, 0.54) | 60 | 0.26 (0.21, 0.33) | 0.12 (0.08, 0.20) | 0.18 (0.04, 0.53) | 60 | 0.26 (0.21, 0.33) | 0.12 (0.08, 0.20) | 0.18 (0.04, 0.53) |
| X- 03056_200 | 60 | 0.24 (0.19, 0.30) | 0.28 (0.23, 0.34) | 0.59 (0.42, 0.74) | 60 | 0.24 (0.19, 0.30) | 0.28 (0.23, 0.34) | 0.59 (0.42, 0.74) | 59 | 0.21 (0.17, 0.27) | 0.27 (0.22, 0.32) | 0.61 (0.44, 0.75) |
| X- 03088     | 52 | 0.26 (0.20, 0.34) | 0.06 (0.02, 0.18) | 0.05 (0.00, 0.94) | 60 | 0.31 (0.24, 0.39) | 0.13 (0.07, 0.23) | 0.14 (0.02, 0.56) | 60 | 0.31 (0.24, 0.39) | 0.13 (0.07, 0.23) | 0.14 (0.02, 0.56) |
| X- 03094     | 60 | 0.23 (0.18, 0.29) | 0.18 (0.14, 0.24) | 0.38 (0.20, 0.61) | 60 | 0.23 (0.18, 0.29) | 0.18 (0.14, 0.24) | 0.38 (0.20, 0.61) | 60 | 0.23 (0.18, 0.29) | 0.18 (0.14, 0.24) | 0.38 (0.20, 0.61) |
| X- 04272     | 58 | 0.22 (0.18, 0.28) | 0.06 (0.03, 0.14) | 0.08 (0.00, 0.75) | 60 | 0.25 (0.20, 0.30) | (,.,.)            | 0.00 (,.,.)       | 59 | 0.24 (0.19, 0.30) | 0.06 (0.02, 0.15) | 0.05 (0.00, 0.91) |
| X- 04357     | 60 | 0.44 (0.32, 0.61) | 0.30 (0.18, 0.48) | 0.31 (0.13, 0.57) | 60 | 0.44 (0.32, 0.61) | 0.30 (0.18, 0.48) | 0.31 (0.13, 0.57) | 58 | 0.31 (0.24, 0.41) | 0.28 (0.21, 0.38) | 0.45 (0.27, 0.65) |
| X- 04494     | 44 | 0.26 (0.20, 0.35) | 0.19 (0.13, 0.28) | 0.34 (0.14, 0.62) | 60 | 0.37 (0.28, 0.49) | 0.16 (0.09, 0.31) | 0.16 (0.03, 0.54) | 60 | 0.37 (0.28, 0.49) | 0.16 (0.09, 0.31) | 0.16 (0.03, 0.54) |
| X- 04495     | 58 | 0.35 (0.26, 0.47) | 0.33 (0.24, 0.44) | 0.47 (0.28, 0.66) | 60 | 0.35 (0.26, 0.46) | 0.33 (0.25, 0.45) | 0.48 (0.29, 0.67) | 58 | 0.25 (0.20, 0.33) | 0.32 (0.27, 0.39) | 0.62 (0.45, 0.76) |
| X- 04498     | 57 | 0.34 (0.25, 0.44) | 0.32 (0.24, 0.43) | 0.48 (0.29, 0.67) | 60 | 0.34 (0.26, 0.45) | 0.33 (0.25, 0.44) | 0.49 (0.31, 0.68) | 58 | 0.27 (0.21, 0.34) | 0.30 (0.24, 0.38) | 0.56 (0.38, 0.72) |
| X- 04499     | 52 | 0.22 (0.17, 0.28) | 0.27 (0.22, 0.33) | 0.61 (0.43, 0.76) | 60 | 0.25 (0.20, 0.32) | 0.29 (0.24, 0.36) | 0.57 (0.40, 0.73) | 60 | 0.25 (0.20, 0.32) | 0.29 (0.24, 0.36) | 0.57 (0.40, 0.73) |
| X- 04500     | 23 | 0.57 (0.23, 1.43) | 1.71 (1.26, 2.33) | 0.90 (0.79, 0.96) | 60 | 0.96 (0.41, 2.22) | 2.46 (1.78, 3.42) | 0.87 (0.79, 0.92) | 59 | 1.01 (0.39, 2.61) | 2.86 (2.04, 4.00) | 0.89 (0.82, 0.93) |
| X- 04598     | 41 | 0.46 (0.31, 0.68) | 0.17 (0.06, 0.48) | 0.12 (0.01, 0.70) | 60 | 0.60 (0.41, 0.89) | 0.32 (0.16, 0.67) | 0.22 (0.07, 0.53) | 59 | 0.50 (0.35, 0.70) | 0.26 (0.13, 0.50) | 0.21 (0.06, 0.54) |
| X- 04807     | 60 | 0.36 (0.27, 0.47) | 0.16 (0.08, 0.29) | 0.16 (0.03, 0.54) | 60 | 0.36 (0.27, 0.47) | 0.16 (0.08, 0.29) | 0.16 (0.03, 0.54) | 60 | 0.36 (0.27, 0.47) | 0.16 (0.08, 0.29) | 0.16 (0.03, 0.54) |
| X- 04874     | 60 | 0.23 (0.18, 0.28) | 0.15 (0.11, 0.21) | 0.30 (0.12, 0.56) | 60 | 0.23 (0.18, 0.28) | 0.15 (0.11, 0.21) | 0.30 (0.12, 0.56) | 60 | 0.23 (0.18, 0.28) | 0.15 (0.11, 0.21) | 0.30 (0.12, 0.56) |
| X- 05415     | 16 | 0.38 (0.22, 0.67) | 0.23 (0.09, 0.58) | 0.26 (0.03, 0.79) | 60 | 0.71 (0.45, 1.12) | 0.51 (0.27, 0.96) | 0.34 (0.16, 0.58) | 59 | 0.61 (0.40, 0.92) | 0.51 (0.31, 0.83) | 0.41 (0.22, 0.62) |
| X- 05907     | 60 | 0.21 (0.17, 0.26) | 0.17 (0.13, 0.22) | 0.41 (0.22, 0.62) | 60 | 0.21 (0.17, 0.26) | 0.17 (0.13, 0.22) | 0.41 (0.22, 0.62) | 60 | 0.21 (0.17, 0.26) | 0.17 (0.13, 0.22) | 0.41 (0.22, 0.62) |
| X- 06126_201 | 60 | 0.53 (0.37, 0.75) | 0.36 (0.21, 0.61) | 0.32 (0.14, 0.57) | 60 | 0.53 (0.37, 0.75) | 0.36 (0.21, 0.61) | 0.32 (0.14, 0.57) | 58 | 0.42 (0.31, 0.58) | 0.38 (0.27, 0.54) | 0.45 (0.26, 0.65) |
| X- 06226     | 59 | 0.22 (0.18, 0.28) | 0.15 (0.11, 0.21) | 0.31 (0.13, 0.57) | 60 | 0.23 (0.18, 0.29) | 0.16 (0.11, 0.22) | 0.31 (0.14, 0.57) | 60 | 0.23 (0.18, 0.29) | 0.16 (0.11, 0.22) | 0.31 (0.14, 0.57) |
| X- 06267     | 59 | 0.28 (0.22, 0.36) | 0.14 (0.09, 0.23) | 0.21 (0.06, 0.54) | 60 | 0.28 (0.22, 0.36) | 0.15 (0.09, 0.23) | 0.21 (0.06, 0.53) | 60 | 0.28 (0.22, 0.36) | 0.15 (0.09, 0.23) | 0.21 (0.06, 0.53) |
| X- 06307     | 53 | 0.30 (0.23, 0.40) | 0.23 (0.16, 0.33) | 0.35 (0.16, 0.61) | 60 | 0.34 (0.26, 0.44) | 0.20 (0.13, 0.31) | 0.26 (0.09, 0.54) | 60 | 0.34 (0.26, 0.44) | 0.20 (0.13, 0.31) | 0.26 (0.09, 0.54) |
| X- 06346     | 60 | 0.18 (0.15, 0.23) | 0.07 (0.04, 0.12) | 0.13 (0.02, 0.57) | 60 | 0.18 (0.15, 0.23) | 0.07 (0.04, 0.12) | 0.13 (0.02, 0.57) | 60 | 0.18 (0.15, 0.23) | 0.07 (0.04, 0.12) | 0.13 (0.02, 0.57) |
| X- 06351     | 14 | 0.35 (0.20, 0.61) | 0.19 (0.06, 0.53) | 0.22 (0.01, 0.84) | 60 | 0.65 (0.43, 0.98) | 0.26 (0.09, 0.73) | 0.14 (0.02, 0.56) | 59 | 0.64 (0.42, 0.97) | 0.34 (0.15, 0.75) | 0.22 (0.06, 0.54) |
| X- 07765_201 | 52 | 0.89 (0.47, 1.66) | 0.98 (0.55, 1.73) | 0.55 (0.36, 0.72) | 60 | 0.99 (0.52, 1.88) | 1.10 (0.62, 1.97) | 0.56 (0.38, 0.72) | 59 | 0.85 (0.49, 1.45) | 0.60 (0.28, 1.28) | 0.33 (0.15, 0.58) |
| X- 08402     | 59 | 0.24 (0.19, 0.31) | 0.28 (0.22, 0.34) | 0.56 (0.38, 0.72) | 60 | 0.25 (0.19, 0.31) | 0.28 (0.23, 0.35) | 0.57 (0.39, 0.72) | 59 | 0.18 (0.14, 0.22) | 0.30 (0.27, 0.34) | 0.75 (0.62, 0.84) |
| X- 08766     | 27 | 0.32 (0.22, 0.48) | 0.10 (0.03, 0.35) | 0.08 (0.00, 0.94) | 60 | 0.37 (0.28, 0.49) | 0.25 (0.17, 0.38) | 0.32 (0.14, 0.57) | 60 | 0.37 (0.28, 0.49) | 0.25 (0.17, 0.38) | 0.32 (0.14, 0.57) |
| X- 09026     | 60 | 0.18 (0.15, 0.22) | 0.14 (0.10, 0.18) | 0.36 (0.18, 0.59) | 60 | 0.18 (0.15, 0.22) | 0.14 (0.10, 0.18) | 0.36 (0.18, 0.59) | 60 | 0.18 (0.15, 0.22) | 0.14 (0.10, 0.18) | 0.36 (0.18, 0.59) |
| X- 09706     | 60 | 0.28 (0.22, 0.35) | 0.12 (0.07, 0.21) | 0.15 (0.02, 0.55) | 60 | 0.28 (0.22, 0.35) | 0.12 (0.07, 0.21) | 0.15 (0.02, 0.55) | 60 | 0.28 (0.22, 0.35) | 0.12 (0.07, 0.21) | 0.15 (0.02, 0.55) |
| X- 09789_201 | 60 | 0.30 (0.22, 0.39) | 0.57 (0.49, 0.66) | 0.78 (0.67, 0.87) | 60 | 0.30 (0.22, 0.39) | 0.57 (0.49, 0.66) | 0.78 (0.67, 0.87) | 59 | 0.27 (0.20, 0.35) | 0.56 (0.49, 0.64) | 0.82 (0.72, 0.89) |
| X- 10346_201 | 12 | 0.40 (0.20, 0.79) | 0.36 (0.17, 0.77) | 0.45 (0.11, 0.83) | 60 | 0.52 (0.35, 0.78) | 0.86 (0.68, 1.11) | 0.73 (0.60, 0.83) | 59 | 0.55 (0.37, 0.84) | 0.78 (0.58, 1.04) | 0.66 (0.51, 0.79) |
| X- 10395     | 60 | 0.18 (0.15, 0.23) | 0.18 (0.14, 0.22) | 0.48 (0.30, 0.67) | 60 | 0.18 (0.15, 0.23) | 0.18 (0.14, 0.22) | 0.48 (0.30, 0.67) | 59 | 0.17 (0.14, 0.21) | 0.19 (0.16, 0.23) | 0.55 (0.37, 0.71) |
| X- 10429     | 28 | 0.30 (0.21, 0.44) | 0.12 (0.05, 0.30) | 0.13 (0.01, 0.78) | 60 | 0.53 (0.37, 0.75) | 0.27 (0.14, 0.54) | 0.21 (0.06, 0.53) | 60 | 0.53 (0.37, 0.75) | 0.27 (0.14, 0.54) | 0.21 (0.06, 0.53) |
| X- 10500     | 60 | 0.15 (0.12, 0.18) | 0.20 (0.18, 0.24) | 0.66 (0.50, 0.78) | 60 | 0.15 (0.12, 0.18) | 0.20 (0.18, 0.24) | 0.66 (0.50, 0.78) | 58 | 0.12 (0.10, 0.15) | 0.22 (0.20, 0.25) | 0.76 (0.64, 0.85) |
| X- 10510     | 60 | 0.24 (0.19, 0.30) | 0.29 (0.24, 0.35) | 0.60 (0.44, 0.75) | 60 | 0.24 (0.19, 0.30) | 0.29 (0.24, 0.35) | 0.60 (0.44, 0.75) | 58 | 0.19 (0.15, 0.24) | 0.31 (0.27, 0.35) | 0.73 (0.59, 0.83) |
| X- 11204     | 60 | 0.16 (0.13, 0.20) | 0.17 (0.14, 0.21) | 0.54 (0.37, 0.71) | 60 | 0.16 (0.13, 0.20) | 0.17 (0.14, 0.21) | 0.54 (0.37, 0.71) | 60 | 0.16 (0.13, 0.20) | 0.17 (0.14, 0.21) | 0.54 (0.37, 0.71) |
| X- 11247     | 46 | 1.38 (0.54, 3.53) | 0.66 (0.09, 4.70) | 0.19 (0.03, 0.59) | 60 | 1.18 (0.58, 2.37) | 0.46 (0.08, 2.75) | 0.13 (0.02, 0.57) | 59 | 1.13 (0.58, 2.20) | 0.23 (0.01, 6.29) | 0.04 (0.00, 0.97) |
| X- 11261     | 60 | 0.33 (0.25, 0.43) | 0.45 (0.37, 0.55) | 0.65 (0.50, 0.78) | 60 | 0.33 (0.25, 0.43) | 0.45 (0.37, 0.55) | 0.65 (0.50, 0.78) | 60 | 0.33 (0.25, 0.43) | 0.45 (0.37, 0.55) | 0.65 (0.50, 0.78) |
| X- 11299     | 56 | 0.75 (0.42, 1.33) | 1.28 (0.91, 1.79) | 0.75 (0.62, 0.84) | 60 | 0.77 (0.43, 1.38) | 1.36 (0.98, 1.89) | 0.76 (0.63, 0.85) | 59 | 0.65 (0.39, 1.11) | 1.29 (0.99, 1.69) | 0.80 (0.69, 0.87) |
| X- 11308     | 60 | 0.18 (0.14, 0.23) | 0.50 (0.46, 0.55) | 0.89 (0.82, 0.93) | 60 | 0.18 (0.14, 0.23) | 0.50 (0.46, 0.55) | 0.89 (0.82, 0.93) | 58 | 0.13 (0.10, 0.17) | 0.51 (0.48, 0.54) | 0.94 (0.90, 0.96) |
| X- 11315     | 60 | 0.16 (0.13, 0.20) | 0.48 (0.45, 0.52) | 0.90 (0.84, 0.94) | 60 | 0.16 (0.13, 0.20) | 0.48 (0.45, 0.52) | 0.90 (0.84, 0.94) | 58 | 0.13 (0.10, 0.16) | 0.39 (0.36, 0.42) | 0.90 (0.84, 0.94) |
| X- 11317     | 60 | 0.21 (0.17, 0.27) | 0.23 (0.19, 0.29) | 0.54 (0.36, 0.71) | 60 | 0.21 (0.17, 0.27) | 0.23 (0.19, 0.29) | 0.54 (0.36, 0.71) | 60 | 0.21 (0.17, 0.27) | 0.23 (0.19, 0.29) | 0.54 (0.36, 0.71) |
| X- 11319     | 60 | 0.16 (0.13, 0.19) | 0.13 (0.11, 0.17) | 0.42 (0.23, 0.63) | 60 | 0.16 (0.13, 0.19) | 0.13 (0.11, 0.17) | 0.42 (0.23, 0.63) | 60 | 0.16 (0.13, 0.19) | 0.13 (0.11, 0.17) | 0.42 (0.23, 0.63) |
| X- 11327     | 60 | 0.21 (0.17, 0.27) | 0.16 (0.12, 0.22) | 0.36 (0.18, 0.59) | 60 | 0.21 (0.17, 0.27) | 0.16 (0.12, 0.22) | 0.36 (0.18, 0.59) | 60 | 0.21 (0.17, 0.27) | 0.16 (0.12, 0.22) | 0.36 (0.18, 0.59) |
| X- 11333     | 24 | 0.26 (0.18, 0.38) | 0.20 (0.12, 0.33) | 0.37 (0.12, 0.72) | 60 | 0.25 (0.20, 0.32) | 0.32 (0.26, 0.39) | 0.61 (0.44, 0.75) | 58 | 0.22 (0.17, 0.27) | 0.33 (0.29, 0.39) | 0.71 (0.56, 0.82) |
| X- 11334     | 40 | 0.30 (0.21, 0.43) | 0.60 (0.51, 0.72) | 0.80 (0.67, 0.89) | 60 | 0.33 (0.24, 0.45) | 0.65 (0.55, 0.76) | 0.80 (0.69, 0.87) | 59 | 0.33 (0.25, 0.44) | 0.35 (0.27, 0.45) | 0.53 (0.35, 0.70) |
| X- 11372     | 60 | 0.13 (0.10, 0.16) | 0.40 (0.37, 0.42) | 0.90 (0.85, 0.94) | 60 | 0.13 (0.10, 0.16) | 0.40 (0.37, 0.42) | 0.90 (0.85, 0.94) | 59 | 0.10 (0.08, 0.13) | 0.39 (0.37, 0.42) | 0.93 (0.89, 0.96) |
| X- 11378     | 56 | 0.34 (0.26, 0.46) | 0.30 (0.22, 0.42) | 0.44 (0.25, 0.65) | 60 | 0.55 (0.38, 0.79) | 0.30 (0.15, 0.59) | 0.23 (0.07, 0.54) | 59 | 0.38 (0.28, 0.51) | 0.35 (0.25, 0.48) | 0.46 (0.27, 0.66) |
| X- 11381_201 | 60 | 0.17 (0.14, 0.21) | 0.29 (0.25, 0.33) | 0.74 (0.60, 0.83) | 60 | 0.17 (0.14, 0.21) | 0.29 (0.25, 0.33) | 0.74 (0.60, 0.83) | 60 | 0.17 (0.14, 0.21) | 0.29 (0.25, 0.33) | 0.74 (0.60, 0.83) |
| X- 11412     | 51 | 0.24 (0.19, 0.31) | 0.14 (0.09, 0.22) | 0.25 (0.08, 0.57) | 60 | 0.28 (0.22, 0.36) | 0.16 (0.10, 0.24) | 0.24 (0.08, 0.54) | 60 | 0.28 (0.22, 0.36) | 0.16 (0.10, 0.24) | 0.24 (0.08, 0.54) |
| X- 11421     | 60 | 0.31 (0.23, 0.42) | 0.68 (0.59, 0.78) | 0.83 (0.73, 0.89) | 60 | 0.31 (0.23, 0.42) | 0.68 (0.59, 0.78) | 0.83 (0.73, 0.89) | 58 | 0.17 (0.13, 0.22) | 0.60 (0.56, 0.65) | 0.92 (0.88, 0.95) |
| X- 11423     | 60 | 0.13 (0.11, 0.17) | 0.25 (0.22, 0.28) | 0.77 (0.65, 0.86) | 60 | 0.13 (0.11, 0.17) | 0.25 (0.22, 0.28) | 0.77 (0.65, 0.86) | 58 | 0.11 (0.09, 0.13) | 0.20 (0.18, 0.23) | 0.78 (0.66, 0.86) |
| X- 11429     | 60 | 0.18 (0.15, 0.23) | 0.23 (0.20, 0.28) | 0.62 (0.45, 0.76) | 60 | 0.18 (0.15, 0.23) | 0.23 (0.20, 0.28) | 0.62 (0.45, 0.76) | 59 | 0.17 (0.14, 0.22) | 0.24 (0.20, 0.28) | 0.65 (0.50, 0.78) |
| X- 11437     | 27 | 0.34 (0.22, 0.53) | 0.52 (0.39, 0.69) | 0.70 (0.48, 0.85) | 60 | 0.50 (0.33, 0.77) | 1.07 (0.88, 1.31) | 0.82 (0.72, 0.89) | 59 | 0.45 (0.30, 0.67) | 1.04 (0.87, 1.24) | 0.84 (0.76, 0.90) |
| X- 11438     | 58 | 0.27 (0.21, 0.35) | 0.45 (0.38, 0.53) | 0.73 (0.60, 0.83) | 60 | 0.27 (0.21, 0.36) | 0.47 (0.40, 0.55) | 0.75 (0.62, 0.84) | 60 | 0.27 (0.21, 0.36) | 0.47 (0.40, 0.55) | 0.75 (0.62, 0.84) |

|              |    |                    |                    |                   |    |                   |                    |                   |    |                   |                   |                   |
|--------------|----|--------------------|--------------------|-------------------|----|-------------------|--------------------|-------------------|----|-------------------|-------------------|-------------------|
| X- 11440     | 56 | 0.62 (0.37, 1.06)  | 1.30 (1.01, 1.68)  | 0.81 (0.71, 0.89) | 60 | 0.64 (0.38, 1.08) | 1.35 (1.06, 1.73)  | 0.82 (0.72, 0.89) | 59 | 0.25 (0.19, 0.34) | 0.75 (0.68, 0.83) | 0.90 (0.84, 0.94) |
| X- 11441     | 8  | 0.42 (0.18, 1.00)  | 0.40 (0.16, 0.99)  | 0.47 (0.09, 0.89) | 60 | 0.42 (0.30, 0.57) | 0.39 (0.28, 0.54)  | 0.47 (0.29, 0.66) | 59 | 0.36 (0.27, 0.49) | 0.45 (0.35, 0.57) | 0.60 (0.44, 0.75) |
| X- 11442     | 17 | 0.33 (0.20, 0.55)  | 0.32 (0.19, 0.54)  | 0.48 (0.18, 0.80) | 60 | 0.47 (0.33, 0.66) | 0.48 (0.35, 0.67)  | 0.52 (0.34, 0.69) | 58 | 0.37 (0.27, 0.51) | 0.51 (0.41, 0.64) | 0.66 (0.50, 0.79) |
| X- 11444     | 58 | 0.18 (0.15, 0.23)  | 0.36 (0.32, 0.40)  | 0.79 (0.68, 0.87) | 60 | 0.19 (0.15, 0.24) | 0.38 (0.34, 0.43)  | 0.80 (0.69, 0.87) | 59 | 0.18 (0.14, 0.22) | 0.40 (0.36, 0.44) | 0.83 (0.74, 0.90) |
| X- 11452     | 45 | 0.70 (0.38, 1.30)  | 1.21 (0.85, 1.73)  | 0.75 (0.60, 0.86) | 60 | 0.72 (0.41, 1.26) | 1.34 (0.99, 1.81)  | 0.78 (0.66, 0.86) | 59 | 0.69 (0.42, 1.12) | 0.91 (0.63, 1.32) | 0.64 (0.48, 0.77) |
| X- 11469     | 57 | 0.39 (0.27, 0.56)  | 0.83 (0.70, 0.98)  | 0.82 (0.72, 0.89) | 60 | 0.40 (0.28, 0.57) | 0.85 (0.72, 1.00)  | 0.82 (0.72, 0.89) | 59 | 0.31 (0.23, 0.43) | 0.72 (0.63, 0.83) | 0.84 (0.75, 0.90) |
| X- 11470     | 47 | 0.23 (0.17, 0.30)  | 0.42 (0.36, 0.49)  | 0.77 (0.64, 0.87) | 60 | 0.25 (0.19, 0.33) | 0.51 (0.45, 0.58)  | 0.81 (0.70, 0.88) | 59 | 0.23 (0.18, 0.31) | 0.54 (0.48, 0.61) | 0.84 (0.75, 0.90) |
| X- 11476     | 51 | 0.28 (0.21, 0.36)  | 0.17 (0.11, 0.27)  | 0.28 (0.10, 0.58) | 60 | 0.33 (0.25, 0.43) | 0.19 (0.12, 0.30)  | 0.25 (0.09, 0.54) | 59 | 0.29 (0.23, 0.38) | 0.19 (0.13, 0.28) | 0.30 (0.12, 0.56) |
| X- 11478     | 59 | 0.52 (0.36, 0.75)  | 0.47 (0.31, 0.71)  | 0.45 (0.26, 0.65) | 60 | 0.53 (0.36, 0.76) | 0.48 (0.32, 0.72)  | 0.46 (0.28, 0.65) | 59 | 0.42 (0.31, 0.58) | 0.45 (0.33, 0.61) | 0.53 (0.35, 0.70) |
| X- 11483     | 43 | 0.55 (0.34, 0.89)  | 0.77 (0.54, 1.08)  | 0.66 (0.48, 0.80) | 60 | 0.60 (0.38, 0.94) | 0.96 (0.72, 1.27)  | 0.72 (0.58, 0.82) | 57 | 0.42 (0.29, 0.61) | 0.88 (0.73, 1.05) | 0.81 (0.71, 0.89) |
| X- 11485     | 14 | 0.24 (0.15, 0.40)  | 0.28 (0.18, 0.43)  | 0.57 (0.23, 0.85) | 60 | 0.31 (0.24, 0.40) | 0.34 (0.26, 0.43)  | 0.54 (0.36, 0.71) | 58 | 0.24 (0.19, 0.31) | 0.26 (0.20, 0.32) | 0.52 (0.34, 0.70) |
| X- 11491     | 31 | 0.48 (0.27, 0.86)  | 1.05 (0.81, 1.37)  | 0.83 (0.69, 0.91) | 60 | 0.54 (0.33, 0.87) | 1.30 (1.06, 1.59)  | 0.85 (0.77, 0.91) | 58 | 0.44 (0.31, 0.62) | 0.62 (0.48, 0.79) | 0.67 (0.51, 0.79) |
| X- 11497     | 60 | 0.19 (0.16, 0.24)  | 0.23 (0.19, 0.28)  | 0.59 (0.42, 0.74) | 60 | 0.19 (0.16, 0.24) | 0.23 (0.19, 0.28)  | 0.59 (0.42, 0.74) | 60 | 0.19 (0.16, 0.24) | 0.23 (0.19, 0.28) | 0.59 (0.42, 0.74) |
| X- 11521     | 55 | 0.27 (0.21, 0.35)  | 0.24 (0.18, 0.32)  | 0.43 (0.24, 0.64) | 60 | 0.28 (0.22, 0.37) | 0.27 (0.21, 0.35)  | 0.47 (0.29, 0.66) | 60 | 0.28 (0.22, 0.37) | 0.27 (0.21, 0.35) | 0.47 (0.29, 0.66) |
| X- 11529     | 46 | 0.29 (0.20, 0.42)  | 0.88 (0.78, 0.99)  | 0.90 (0.84, 0.95) | 60 | 0.31 (0.22, 0.44) | 1.01 (0.90, 1.12)  | 0.91 (0.86, 0.95) | 58 | 0.26 (0.20, 0.34) | 0.55 (0.48, 0.63) | 0.82 (0.72, 0.89) |
| X- 11530     | 56 | 0.59 (0.38, 0.91)  | 0.76 (0.54, 1.07)  | 0.62 (0.46, 0.77) | 60 | 0.59 (0.39, 0.91) | 0.74 (0.53, 1.04)  | 0.61 (0.45, 0.75) | 59 | 0.53 (0.36, 0.78) | 0.56 (0.39, 0.80) | 0.52 (0.34, 0.70) |
| X- 11537     | 60 | 0.43 (0.31, 0.60)  | 0.40 (0.28, 0.56)  | 0.45 (0.27, 0.65) | 60 | 0.43 (0.31, 0.60) | 0.40 (0.28, 0.56)  | 0.45 (0.27, 0.65) | 60 | 0.43 (0.31, 0.60) | 0.40 (0.28, 0.56) | 0.45 (0.27, 0.65) |
| X- 11538     | 60 | 0.25 (0.19, 0.31)  | 0.32 (0.27, 0.39)  | 0.63 (0.47, 0.77) | 60 | 0.25 (0.19, 0.31) | 0.32 (0.27, 0.39)  | 0.63 (0.47, 0.77) | 60 | 0.25 (0.19, 0.31) | 0.32 (0.27, 0.39) | 0.63 (0.47, 0.77) |
| X- 11540     | 60 | 0.42 (0.31, 0.58)  | 0.32 (0.21, 0.48)  | 0.36 (0.18, 0.59) | 60 | 0.42 (0.31, 0.58) | 0.32 (0.21, 0.48)  | 0.36 (0.18, 0.59) | 60 | 0.42 (0.31, 0.58) | 0.32 (0.21, 0.48) | 0.36 (0.18, 0.59) |
| X- 11546     | 40 | 1.32 (0.47, 3.66)  | 1.32 (0.48, 3.66)  | 0.50 (0.28, 0.72) | 60 | 1.51 (0.57, 3.97) | 1.63 (0.67, 3.99)  | 0.54 (0.36, 0.71) | 58 | 1.19 (0.53, 2.67) | 1.47 (0.77, 2.83) | 0.60 (0.43, 0.75) |
| X- 11550     | 60 | 0.11 (0.09, 0.14)  | 0.17 (0.15, 0.19)  | 0.68 (0.54, 0.80) | 60 | 0.11 (0.09, 0.14) | 0.17 (0.15, 0.19)  | 0.68 (0.54, 0.80) | 60 | 0.11 (0.09, 0.14) | 0.17 (0.15, 0.19) | 0.68 (0.54, 0.80) |
| X- 11556     | 57 | 0.32 (0.24, 0.41)  | 0.23 (0.16, 0.33)  | 0.34 (0.16, 0.59) | 60 | 0.32 (0.25, 0.42) | 0.22 (0.15, 0.32)  | 0.31 (0.13, 0.57) | 59 | 0.28 (0.22, 0.36) | 0.26 (0.20, 0.34) | 0.46 (0.28, 0.66) |
| X- 11561     | 14 | 0.10 (0.07, 0.15)  | 0.08 (0.04, 0.13)  | 0.36 (0.07, 0.80) | 60 | 0.11 (0.09, 0.13) | 0.14 (0.12, 0.16)  | 0.62 (0.46, 0.76) | 59 | 0.10 (0.08, 0.12) | 0.15 (0.13, 0.17) | 0.68 (0.53, 0.80) |
| X- 11564     | 60 | 0.16 (0.13, 0.20)  | 0.24 (0.20, 0.27)  | 0.68 (0.53, 0.80) | 60 | 0.16 (0.13, 0.20) | 0.24 (0.20, 0.27)  | 0.68 (0.53, 0.80) | 60 | 0.16 (0.13, 0.20) | 0.24 (0.20, 0.27) | 0.68 (0.53, 0.80) |
| X- 11593     | 60 | 0.21 (0.17, 0.26)  | 0.30 (0.26, 0.35)  | 0.67 (0.52, 0.79) | 60 | 0.21 (0.17, 0.26) | 0.30 (0.26, 0.35)  | 0.67 (0.52, 0.79) | 60 | 0.21 (0.17, 0.26) | 0.30 (0.26, 0.35) | 0.67 (0.52, 0.79) |
| X- 11687_200 | 30 | 0.15 (0.11, 0.20)  | 0.17 (0.13, 0.22)  | 0.54 (0.30, 0.77) | 60 | 0.16 (0.13, 0.20) | 0.21 (0.18, 0.25)  | 0.64 (0.48, 0.77) | 59 | 0.14 (0.12, 0.18) | 0.21 (0.18, 0.24) | 0.68 (0.54, 0.80) |
| X- 11786     | 60 | 0.59 (0.41, 0.85)  | (.,.)              | 0.00 (.,.)        | 60 | 0.59 (0.41, 0.85) | (.,.)              | 0.00 (.,.)        | 59 | 0.46 (0.33, 0.63) | 0.10 (0.02, 0.44) | 0.04 (0.00, 0.95) |
| X- 11787     | 60 | 0.09 (0.07, 0.10)  | 0.19 (0.18, 0.21)  | 0.83 (0.74, 0.90) | 60 | 0.09 (0.07, 0.10) | 0.19 (0.18, 0.21)  | 0.83 (0.74, 0.90) | 60 | 0.09 (0.07, 0.10) | 0.19 (0.18, 0.21) | 0.83 (0.74, 0.90) |
| X- 11793     | 58 | 0.28 (0.22, 0.36)  | 0.20 (0.14, 0.29)  | 0.34 (0.16, 0.59) | 60 | 0.28 (0.22, 0.36) | 0.22 (0.16, 0.30)  | 0.39 (0.20, 0.61) | 60 | 0.28 (0.22, 0.36) | 0.22 (0.16, 0.30) | 0.39 (0.20, 0.61) |
| X- 11795     | 60 | 0.18 (0.14, 0.22)  | 0.44 (0.40, 0.48)  | 0.86 (0.78, 0.91) | 60 | 0.18 (0.14, 0.22) | 0.44 (0.40, 0.48)  | 0.86 (0.78, 0.91) | 59 | 0.15 (0.12, 0.19) | 0.46 (0.43, 0.50) | 0.91 (0.85, 0.94) |
| X- 11799     | 10 | 1.36 (0.19, 9.57)  | 0.37 (0.00, 472.4) | 0.07 (0.00, 1.00) | 60 | 1.44 (0.61, 3.43) | 0.86 (0.20, 3.67)  | 0.26 (0.10, 0.55) | 58 | 0.89 (0.50, 1.59) | 0.73 (0.36, 1.47) | 0.40 (0.21, 0.62) |
| X- 11805     | 55 | 0.46 (0.33, 0.64)  | 0.31 (0.19, 0.52)  | 0.32 (0.14, 0.58) | 60 | 0.47 (0.34, 0.65) | 0.35 (0.22, 0.54)  | 0.36 (0.17, 0.59) | 59 | 0.46 (0.33, 0.65) | 0.38 (0.25, 0.57) | 0.40 (0.22, 0.62) |
| X- 11818     | 59 | 0.39 (0.29, 0.52)  | 0.33 (0.23, 0.46)  | 0.41 (0.23, 0.63) | 60 | 0.39 (0.29, 0.53) | 0.33 (0.24, 0.47)  | 0.42 (0.24, 0.63) | 59 | 0.30 (0.23, 0.40) | 0.40 (0.33, 0.49) | 0.64 (0.48, 0.77) |
| X- 11820     | 60 | 0.21 (0.16, 0.26)  | 0.29 (0.25, 0.34)  | 0.66 (0.51, 0.79) | 60 | 0.21 (0.16, 0.26) | 0.29 (0.25, 0.34)  | 0.66 (0.51, 0.79) | 60 | 0.21 (0.16, 0.26) | 0.29 (0.25, 0.34) | 0.66 (0.51, 0.79) |
| X- 11837_200 | 31 | 0.54 (0.32, 0.90)  | 0.38 (0.19, 0.79)  | 0.33 (0.11, 0.67) | 60 | 0.66 (0.43, 1.02) | 0.55 (0.32, 0.93)  | 0.41 (0.22, 0.62) | 58 | 0.51 (0.35, 0.75) | 0.59 (0.42, 0.82) | 0.57 (0.39, 0.73) |
| X- 11838     | 8  | 0.76 (0.22, 2.57)  | (.,.)              | 0.00 (.,.)        | 60 | 1.01 (0.55, 1.87) | 0.49 (0.13, 1.75)  | 0.19 (0.04, 0.53) | 58 | 0.56 (0.38, 0.81) | 0.32 (0.17, 0.62) | 0.25 (0.08, 0.55) |
| X- 11843     | 30 | 0.29 (0.20, 0.43)  | 0.51 (0.41, 0.64)  | 0.76 (0.58, 0.88) | 60 | 0.34 (0.24, 0.48) | 0.83 (0.72, 0.95)  | 0.86 (0.78, 0.91) | 59 | 0.30 (0.21, 0.41) | 0.81 (0.72, 0.91) | 0.88 (0.81, 0.93) |
| X- 11849     | 8  | 0.32 (0.13, 0.76)  | 0.75 (0.52, 1.09)  | 0.85 (0.55, 0.96) | 60 | 0.94 (0.51, 1.72) | 0.88 (0.46, 1.68)  | 0.47 (0.28, 0.66) | 59 | 0.82 (0.46, 1.50) | 1.24 (0.83, 1.84) | 0.69 (0.55, 0.81) |
| X- 11850     | 32 | 0.28 (0.19, 0.43)  | 0.71 (0.60, 0.83)  | 0.86 (0.74, 0.93) | 60 | 0.35 (0.24, 0.51) | 1.04 (0.92, 1.18)  | 0.90 (0.84, 0.94) | 58 | 0.29 (0.21, 0.41) | 0.87 (0.78, 0.97) | 0.90 (0.84, 0.94) |
| X- 11853     | 57 | 0.18 (0.14, 0.22)  | 0.17 (0.13, 0.21)  | 0.46 (0.27, 0.66) | 60 | 0.19 (0.16, 0.24) | 0.16 (0.13, 0.21)  | 0.42 (0.24, 0.63) | 60 | 0.19 (0.16, 0.24) | 0.16 (0.13, 0.21) | 0.42 (0.24, 0.63) |
| X- 11860     | 60 | 0.21 (0.17, 0.26)  | 0.09 (0.06, 0.15)  | 0.16 (0.03, 0.54) | 60 | 0.21 (0.17, 0.26) | 0.09 (0.06, 0.15)  | 0.16 (0.03, 0.54) | 59 | 0.20 (0.16, 0.24) | 0.11 (0.07, 0.16) | 0.24 (0.08, 0.54) |
| X- 11880     | 58 | 0.16 (0.13, 0.20)  | 0.41 (0.38, 0.45)  | 0.87 (0.79, 0.92) | 60 | 0.18 (0.14, 0.22) | 0.40 (0.36, 0.45)  | 0.84 (0.74, 0.90) | 60 | 0.18 (0.14, 0.22) | 0.40 (0.36, 0.45) | 0.84 (0.74, 0.90) |
| X- 11904     | 4  | 1.11 (0.07, 18.50) | 1.26 (0.11, 15.02) | 0.56 (0.08, 0.95) | 60 | 0.35 (0.26, 0.47) | 0.43 (0.34, 0.54)  | 0.60 (0.43, 0.74) | 59 | 0.19 (0.16, 0.24) | 0.12 (0.09, 0.17) | 0.29 (0.12, 0.56) |
| X- 11905     | 19 | 0.40 (0.23, 0.70)  | 0.39 (0.22, 0.68)  | 0.48 (0.18, 0.79) | 60 | 0.47 (0.34, 0.66) | 0.40 (0.27, 0.59)  | 0.42 (0.23, 0.63) | 58 | 0.47 (0.33, 0.65) | 0.36 (0.23, 0.55) | 0.37 (0.19, 0.60) |
| X- 12038     | 60 | 0.22 (0.18, 0.28)  | 0.31 (0.26, 0.37)  | 0.66 (0.51, 0.79) | 60 | 0.22 (0.18, 0.28) | 0.31 (0.26, 0.37)  | 0.66 (0.51, 0.79) | 60 | 0.22 (0.18, 0.28) | 0.31 (0.26, 0.37) | 0.66 (0.51, 0.79) |
| X- 12039     | 21 | 0.46 (0.23, 0.91)  | 1.00 (0.73, 1.38)  | 0.83 (0.65, 0.92) | 60 | 0.52 (0.33, 0.82) | 1.21 (1.00, 1.47)  | 0.85 (0.76, 0.91) | 58 | 0.36 (0.24, 0.53) | 1.06 (0.93, 1.21) | 0.90 (0.84, 0.94) |
| X- 12051     | 60 | 0.47 (0.34, 0.65)  | 0.23 (0.11, 0.45)  | 0.19 (0.04, 0.53) | 60 | 0.47 (0.34, 0.65) | 0.23 (0.11, 0.45)  | 0.19 (0.04, 0.53) | 60 | 0.47 (0.34, 0.65) | 0.23 (0.11, 0.45) | 0.19 (0.04, 0.53) |
| X- 12056     | 33 | 1.81 (0.44, 7.41)  | 0.37 (0.00, 386.0) | 0.04 (0.00, 1.00) | 60 | 1.37 (0.62, 3.04) | 0.31 (0.01, 10.78) | 0.05 (0.00, 0.93) | 58 | 0.93 (0.53, 1.65) | 0.20 (0.01, 2.86) | 0.04 (0.00, 0.96) |
| X- 12063     | 37 | 0.17 (0.12, 0.24)  | 0.59 (0.53, 0.64)  | 0.92 (0.86, 0.96) | 60 | 0.19 (0.14, 0.25) | 0.70 (0.65, 0.75)  | 0.93 (0.89, 0.96) | 60 | 0.19 (0.14, 0.25) | 0.70 (0.65, 0.75) | 0.93 (0.89, 0.96) |
| X- 12092     | 59 | 0.30 (0.22, 0.40)  | 0.67 (0.59, 0.77)  | 0.84 (0.74, 0.90) | 60 | 0.30 (0.22, 0.40) | 0.67 (0.59, 0.77)  | 0.84 (0.74, 0.90) | 58 | 0.21 (0.16, 0.28) | 0.74 (0.68, 0.80) | 0.92 (0.88, 0.95) |
| X- 12093     | 30 | 0.40 (0.26, 0.60)  | 0.28 (0.16, 0.51)  | 0.34 (0.11, 0.68) | 60 | 0.40 (0.30, 0.54) | 0.29 (0.19, 0.44)  | 0.34 (0.16, 0.58) | 60 | 0.40 (0.30, 0.54) | 0.29 (0.19, 0.44) | 0.34 (0.16, 0.58) |
| X- 12094     | 60 | 0.62 (0.38, 1.03)  | 1.22 (0.95, 1.58)  | 0.79 (0.69, 0.87) | 60 | 0.62 (0.38, 1.03) | 1.22 (0.95, 1.58)  | 0.79 (0.69, 0.87) | 58 | 0.26 (0.17, 0.40) | 1.33 (1.23, 1.45) | 0.96 (0.94, 0.98) |
| X- 12095_200 | 60 | 0.62 (0.38, 1.00)  | 1.13 (0.86, 1.47)  | 0.77 (0.65, 0.86) | 60 | 0.62 (0.38, 1.00) | 1.13 (0.86, 1.47)  | 0.77 (0.65, 0.86) | 58 | 0.30 (0.20, 0.45) | 1.19 (1.08, 1.32) | 0.94 (0.90, 0.96) |
| X- 12096     | 51 | 0.19 (0.15, 0.25)  | 0.27 (0.23, 0.32)  | 0.66 (0.50, 0.80) | 60 | 0.23 (0.18, 0.29) | 0.29 (0.24, 0.35)  | 0.62 (0.46, 0.76) | 60 | 0.23 (0.18, 0.29) | 0.29 (0.24, 0.35) | 0.62 (0.46, 0.76) |
| X- 12100     | 60 | 0.25 (0.20, 0.31)  | 0.09 (0.04, 0.17)  | 0.11 (0.01, 0.62) | 60 | 0.25 (0.20, 0.31) | 0.09 (0.04, 0.17)  | 0.11 (0.01, 0.62) | 59 | 0.20 (0.16, 0.25) | 0.12 (0.08, 0.17) | 0.26 (0.10, 0.55) |
| X- 12125     | 17 | 0.31 (0.19, 0.50)  | 0.24 (0.13, 0.44)  | 0.38 (0.10, 0.77) | 60 | 0.34 (0.25, 0.45) | 0.50 (0.41, 0.61)  | 0.69 (0.55, 0.81) | 60 | 0.34 (0.25, 0.45) | 0.50 (0.41, 0.61) | 0.69 (0.55, 0.81) |





|           |    |                   |                   |                   |    |                   |                   |                   |    |                   |                   |                   |
|-----------|----|-------------------|-------------------|-------------------|----|-------------------|-------------------|-------------------|----|-------------------|-------------------|-------------------|
| X - 14662 | 22 | 0.20 (0.13, 0.32) | 0.74 (0.65, 0.84) | 0.93 (0.85, 0.97) | 60 | 0.46 (0.31, 0.68) | 0.93 (0.77, 1.13) | 0.81 (0.70, 0.88) | 58 | 0.30 (0.21, 0.43) | 0.98 (0.88, 1.09) | 0.91 (0.86, 0.95) |
| X - 14939 | 57 | 0.48 (0.33, 0.70) | 0.60 (0.45, 0.81) | 0.61 (0.44, 0.76) | 60 | 0.49 (0.34, 0.70) | 0.63 (0.48, 0.84) | 0.63 (0.47, 0.76) | 59 | 0.38 (0.28, 0.52) | 0.54 (0.44, 0.67) | 0.68 (0.52, 0.80) |
| X - 15222 | 60 | 0.14 (0.12, 0.17) | 0.19 (0.17, 0.22) | 0.65 (0.49, 0.78) | 60 | 0.14 (0.12, 0.17) | 0.19 (0.17, 0.22) | 0.65 (0.49, 0.78) | 60 | 0.14 (0.12, 0.17) | 0.19 (0.17, 0.22) | 0.65 (0.49, 0.78) |
| X - 15479 | 55 | 0.26 (0.20, 0.34) | 0.39 (0.33, 0.47) | 0.69 (0.54, 0.81) | 60 | 0.27 (0.21, 0.35) | 0.44 (0.38, 0.52) | 0.73 (0.60, 0.83) | 59 | 0.25 (0.19, 0.32) | 0.47 (0.41, 0.54) | 0.79 (0.67, 0.87) |
| X - 15483 | 32 | 0.20 (0.16, 0.25) | (,.)              | 0.00 (,.)         | 60 | 0.28 (0.23, 0.34) | (,.)              | 0.00 (,.)         | 59 | 0.22 (0.18, 0.27) | 0.06 (0.03, 0.14) | 0.08 (0.00, 0.73) |
| X - 15486 | 41 | 0.50 (0.32, 0.76) | 0.50 (0.32, 0.77) | 0.50 (0.29, 0.72) | 60 | 0.49 (0.34, 0.71) | 0.57 (0.42, 0.78) | 0.57 (0.40, 0.73) | 59 | 0.41 (0.30, 0.56) | 0.50 (0.38, 0.65) | 0.60 (0.43, 0.75) |
| X - 15492 | 56 | 0.23 (0.18, 0.30) | 0.30 (0.25, 0.37) | 0.63 (0.46, 0.77) | 60 | 0.23 (0.18, 0.30) | 0.33 (0.28, 0.39) | 0.67 (0.52, 0.79) | 60 | 0.23 (0.18, 0.30) | 0.33 (0.28, 0.39) | 0.67 (0.52, 0.79) |
| xanthine  | 48 | 0.48 (0.33, 0.69) | 0.07 (0.00, 0.92) | 0.02 (0.00, 1.00) | 60 | 0.52 (0.37, 0.73) | 0.24 (0.11, 0.51) | 0.18 (0.04, 0.54) | 60 | 0.52 (0.37, 0.73) | 0.24 (0.11, 0.51) | 0.18 (0.04, 0.54) |
| xylytol   | 3  | 0.15 (0.08, 0.29) | (,.)              | 0.00 (,.)         | 60 | 0.40 (0.30, 0.53) | 0.16 (0.08, 0.33) | 0.15 (0.02, 0.55) | 58 | 0.32 (0.24, 0.41) | 0.15 (0.09, 0.26) | 0.19 (0.05, 0.54) |
