# Supplementary material
Source: PubMed Central journal article supplement (PMC4048570)
Supplement: Supp_Table2.pdf [file Supp_Table2.pdf]

Supplemental Data Table 2

| Metabolites                                  | N of subjects for ICC_1* | ICC_1* (95% CL)   | N of subjects for ICC_2* | ICC_2* (95% CL)   |
|----------------------------------------------|--------------------------|-------------------|--------------------------|-------------------|
| <b>Males</b>                                 |                          |                   |                          |                   |
| andro steroid monosulfate 2                  | 32                       | 0.61 (0.39, 0.80) | 34                       | 0.63 (0.41, 0.80) |
| androsterone sulfate                         | 34                       | 0.63 (0.41, 0.80) | 34                       | 0.63 (0.41, 0.80) |
| 5alpha-androstan-3beta,17beta-diol disulfate | 33                       | 0.83 (0.70, 0.91) | 34                       | 0.85 (0.72, 0.92) |
| 4-androsten-3beta,17beta-diol disulfate 2    | 34                       | 0.93 (0.87, 0.96) | 34                       | 0.93 (0.87, 0.96) |
| dehydroisoandrosterone sulfate (DHEA-S)      | 34                       | 0.95 (0.90, 0.97) | 34                       | 0.95 (0.90, 0.97) |
| 5alpha-pregnan-3beta,20alpha-diol disulfate  | 22                       | 0.61 (0.34, 0.82) | 34                       | 0.69 (0.50, 0.84) |
| pregn steroid monosulfate                    | 34                       | 0.95 (0.90, 0.97) | 34                       | 0.95 (0.90, 0.97) |
| 21-hydroxypregnenolone disulfate             | 26                       | 0.97 (0.93, 0.99) | 34                       | 0.97 (0.94, 0.98) |
| pregnen-diol disulfate                       | 34                       | 0.99 (0.98, 0.99) | 34                       | 0.99 (0.98, 0.99) |
| Metabolites                                  | N of subjects for ICC_1* | ICC_1* (95% CL)   | N of subjects for ICC_2* | ICC_2* (95% CL)   |
| <b>Females</b>                               |                          |                   |                          |                   |
| andro steroid monosulfate 2                  | 18                       | 0.93 (0.84, 0.97) | 26                       | 0.95 (0.89, 0.98) |
| androsterone sulfate                         | 24                       | 0.79 (0.60, 0.90) | 26                       | 0.82 (0.66, 0.91) |
| 5alpha-androstan-3beta,17beta-diol disulfate | 16                       | 0.83 (0.63, 0.94) | 26                       | 0.90 (0.79, 0.95) |
| 4-androsten-3beta,17beta-diol disulfate 2    | 24                       | 0.92 (0.83, 0.96) | 26                       | 0.93 (0.86, 0.97) |
| dehydroisoandrosterone sulfate (DHEA-S)      | 26                       | 0.96 (0.92, 0.98) | 26                       | 0.96 (0.92, 0.98) |
| 5alpha-pregnan-3beta,20alpha-diol disulfate  | 11                       | 0.78 (0.48, 0.93) | 26                       | 0.79 (0.61, 0.90) |
| pregn steroid monosulfate                    | 26                       | 0.88 (0.76, 0.94) | 26                       | 0.88 (0.76, 0.94) |
| 21-hydroxypregnenolone disulfate             | 11                       | 0.68 (0.33, 0.90) | 26                       | 0.91 (0.81, 0.96) |
| pregnen-diol disulfate                       | 25                       | 0.88 (0.77, 0.95) | 26                       | 0.89 (0.79, 0.95) |

ICC\_1 indicates using no imputation method, and ICC\_2 using imputation method.
